# 1       **Specific and non-uniform brain states during cold perception in mice**

2       **Haritha Koorliyil<sup>1</sup>, Jacobo Sitt<sup>2</sup>, Isabelle Rivals<sup>3</sup>, Yushan Liu<sup>3</sup>, Silvia Cazzanelli<sup>1,4</sup>, Adrien**  
3       **Bertolo<sup>1,4</sup>, Alexandre Dizeux<sup>1</sup>, Thomas Deffieux<sup>1</sup>, Mickael Tanter<sup>1</sup> and Sophie Pezet<sup>1\*</sup>.**

4       <sup>1</sup>Physics for Medicine Paris, INSERM, ESPCI Paris, CNRS, PSL Research University - Paris, France.

5       <sup>2</sup> Institut du Cerveau et de la Moelle épinière, ICM, Inserm U 1127, PICNIC Lab, F-75013, Paris,  
6       France

7       <sup>3</sup> Equipe de Statistique Appliquée, ESPCI Paris, PSL Research University, UMRS 1158, 10 rue  
8       Vauquelin, 75005 Paris, France.

9       <sup>4</sup> Iconeus, 27 Rue du Faubourg Saint-Jacques, 75014 Paris, France

10      \* Corresponding Author: Sophie PEZET

11      Address: Institute of Physics for Medicine Paris, ESPCI Paris, 17 rue Moreau, 75012, Paris, France

12      Email: [sophie.pezet@espci.fr](mailto:sophie.pezet@espci.fr)

13

14      Number of text pages: 47

15      Number of figures: 5

16      Number of tables: 0

17      Number of supplementary materials: 6 (3 figures +3 tables)

18

19      **Keywords:** Primary sensory cortex, ultrafast ultrasound imaging, functional connectivity,  
20      Doppler, thermal sensitivity

21

22      **Short title:** Brain imaging of cold sensing

23

## 24      **Conflict of interest**

25      MT and TD are co-founders and shareholders of Iconeus company. MT and TD are co-inventor of  
26      several patents in the field of neurofunctional ultrasound and ultrafast ultrasound. MT and TD do  
27      not have any other financial conflict of interest, nor any non-financial conflict of interests. All the  
28      other authors do not have any financial or non-financial conflict of interests.

29

## 30 **Authors contribution statement**

31 SP, MT and HK designed the experimental paradigm.

32 SC, AB and HK were involved in the awake functional ultrasound imaging and thermal  
33 experimental setup.

34 HK and SP wrote the manuscript.

35 HK performed the experiments and analyzed the ultrasound data.

36 MT, TD and JS supervised the signal processing of the ultrasound data.

37 IR and YL performed the statistical analysis.

38 AD was involved in the signal processing.

39 SP, MT, JS, HK and IR were involved in the interpretation of the data and wrote some parts of  
40 the manuscript.

41

## 42 **Acknowledgments**

43 The authors wish to thank Nathalie Ialy-Radio for animal husbandry and the CNRS, INSERM

44 and ESPCI for their financial support. This work was supported by a funding from the

45 European Union's Horizon 2020 research and innovation program under the Marie

46 Skłodowska-Curie grant agreement No 754387 (PhD fellowship Miss Koorliyil) and from the

47 Agence Nationale de la recherche (Project 'PINCH', 18-CE37-0005-01). In addition, this work

48 was supported by the Chair in Biomedical Imaging of the AXA Research Fund and the

49 European Research Council (ERC) Advanced Grant FUSIMAGINE.

50

51 **ABSTRACT**

52  
53 The quest to decode the complex supraspinal mechanisms that integrate cutaneous thermal  
54 information in the central system is still ongoing. The dorsal horn of the spinal cord is the  
55 first hub that encodes thermal input which is then transmitted to brain regions via the  
56 spinothalamic and thalamo-cortical pathways. So far, our knowledge about the strength of  
57 the interplay between the brain regions during thermal processing is limited. To address this  
58 question, we imaged the brains of awake and freely-moving mice using Functional  
59 Ultrasound imaging during plantar exposure to constant and varying temperatures. Our  
60 study, a synchronous large field investigation of mice brains reveals for the first time the  
61 brain states and the specific dynamic interplay between key regions involved in thermal  
62 processing. Our study reveals: i) a dichotomy in the response of the somato-motor-cingulate  
63 cortices and the hypothalamus, which was never described before, due to the lack of  
64 appropriate tools to study such regions with both good spatial and temporal resolutions. ii)  
65 We infer that cingulate areas may be involved in the affective responses to temperature  
66 changes. iii) Colder temperatures (ramped down) reinforces the disconnection between the  
67 somato-motor-cingulate and hypothalamus networks. iv) Finally, we also confirm the  
68 existence in the mouse brain of a dynamic brain mode characterized by low cognitive  
69 strength, described previously only in non-human primates and humans. The present study  
70 points towards the existence of a common hub between somato-motor and cingulate regions,  
71 whereas hypothalamus functions are related to a secondary network.

72

73

74

## 75 **INTRODUCTION**

76 Thermal sensation and perception are crucial for maintaining the structural and functional  
77 integrity of all organisms (Gracheva and Bagriantsev, 2015). Thermal changes can elicit a  
78 multitude of responses including rapid motor withdrawal reflex and thermoregulation to  
79 maintain core body temperature. To cope with the changes in the thermal environment,  
80 physiological and behavioral mechanisms are employed permanently (Tan and Knight,  
81 2018). The complex mechanisms that result in the central and peripheral integration of  
82 cutaneous thermal sensations is still not completely understood.

83 Thermal sensations felt on skin are encoded and transmitted to the central nervous system  
84 by primary sensory neurons, such as non-myelinated C fibers and thinly myelinated A $\delta$  fibers  
85 whose terminals act as free nerve endings on the skin (Middleton et al., 2021; Xiao and Xu,  
86 2021). The thermal information is transmitted by the sensory afferents to the dorsal horn via  
87 the TRP channels, which are the molecular thermo-detectors (Peier et al., 2002; Clapham,  
88 2003; Patapoutian et al., 2003; Bandell et al., 2004; Bautista et al., 2007; Dhaka et al., 2007;  
89 Tan and McNaughton, 2016; Hoffstaetter et al., 2018; Vandewauw et al., 2018; Vilar et al.,  
90 2020), and can initiate well-defined responsive pathways, such as: a) activation of motor  
91 neurons resulting in a rapid withdrawal reflex, b) transmission of thermal information via  
92 the spinothalamic tract to various nuclei of the thalamus and finally to several cortical areas  
93 such as the insular cortex and the primary somatosensory cortex where it takes the form of  
94 a perceived temperature, c) initiation of thermoregulatory responses (Vriens et al., 2014).  
95 Although the supraspinal pathways work synergistically to form a thermal perception, the  
96 complex interplay among them is less explored. Studies have shown that several thalamic

97 nuclei (Bushnell et al., 1993; Duncan et al., 1993; Craig et al., 1994; Davis et al., 1999),  
98 somatosensory regions (Becerra et al., 1999; Moulton et al., 2012; Milenkovic et al., 2014)  
99 and the insula (Craig et al., 2000; Olausson et al., 2005; Veldhuijzen et al., 2010; Peltz et al.,  
100 2011; Wager et al., 2013; Gogolla et al., 2014) are crucial for thermosensation. Although the  
101 cingulate region is not a direct part of the thermosensory circuit, it is involved in the affective  
102 responses to the nociceptive thermal stimulations (Vogt, 2005). The preoptic anterior  
103 hypothalamus (POAH) has been linked to thermoregulatory behavior in numerous studies  
104 (Ishiwata et al., 2002; DiMicco and Zaretsky, 2007; Wang et al., 2019).

105 The present study aimed at understanding the involvement of some of the aforementioned  
106 brain regions using functional ultrasound (fUS) imaging, which is a relatively new versatile  
107 neuroimaging modality that allows imaging and measurement of cerebral blood volume in  
108 humans (Demene et al., 2017; Imbault et al., 2017; Soloukey et al., 2020), non-human  
109 primates (Dizeux et al., 2019) and rodents (Macé et al., 2011; Sieu et al., 2015; Urban et al.,  
110 2015; Bergel et al., 2018; Rahal et al., 2020) with excellent spatial (100 to 300  $\mu\text{m}$ ) and  
111 temporal resolutions (down to 20 ms). One of its most important characteristics is its high  
112 sensitivity compared to fMRI (Boido et al., 2019). Indeed, during a task, due to neurovascular  
113 coupling, the locally increased neuronal activity leads to a strong hemodynamic response  
114 (Iadecola, 2017). In the past, fUS imaging proved sensitive enough to enable the  
115 measurement of the cortical hemodynamic changes induced by sensory (Macé et al., 2011),  
116 olfactory (Osmanski et al., 2014a) and visual (Macé et al., 2018) stimuli in anesthetized  
117 animals. Another very important characteristic of fUS imaging consists in its ability to  
118 perform acquisitions in awake and behaving animals (Montaldo et al., 2022), as  
119 demonstrated for auditory stimuli in awake animals (Bimbard et al., 2018) or motor tasks

120 (Sieu et al., 2015; Bergel et al., 2020). Taking advantage of the sensitivity of this technique  
121 and the ability to study freely moving animal, this study aimed at improving our  
122 understanding of the processing of warm and cold sensing by studying the changes of  
123 intrinsic brain connectivity in freely moving mice during plantar exposure to warm, cold and  
124 neutral surfaces, and to the variations of the surface temperature. The analysis of the static  
125 and dynamic functional connectivity reveals that cold induces a strongly increased  
126 connectivity in the somato-motor (SM) network, but also a decreased connectivity between  
127 the SM areas and the hypothalamus.

128

129

## 130 **MATERIALS AND METHODS**

### 131 **ANIMALS**

132 The experiments were conducted in compliance with the European Community Council  
133 Directive of 22 September 2010 (010/63/UE) and the local ethics committee (Comité  
134 d'éthique en matière d'expérimentation animale N° 59, "Paris Centre et Sud", project 2018-  
135 05). Accordingly, the number of animals in our study was kept to the minimum necessary.  
136 Due to previous studies using a similar experimental design (Rabut et al., 2020), we  
137 established that N=6 animals per group was the smallest number of animals required to  
138 detect statistically significant differences in our imaging experiments. Finally, all methods are  
139 in accordance with ARRIVE guidelines.

140 Animals arrived at the animal facilities one week before the beginning of experiments.  
141 Twelve C57Bl/6 male mice (aged 7 weeks at the beginning of the experiments) were obtained  
142 from Janvier labs (France) and housed under controlled temperature ( $22 \pm 1^\circ\text{C}$ ), relative  
143 humidity ( $55 \pm 10\%$ ), with a 12-hour light/dark cycle. Finally, food and water were available  
144 ad libitum. Experiments typically lasted for 4-6 weeks.

145 Constant temperature and temperature ramp experiments were conducted in two different  
146 sets of N=8 and N=6 mice (Figure 1). When possible, animals were imaged more than once in  
147 each experimental condition. Indeed, due to motion artifacts, some sessions had to be  
148 discarded (see below). Details of data included from the various animals are listed in  
149 supplementary table 1.

150

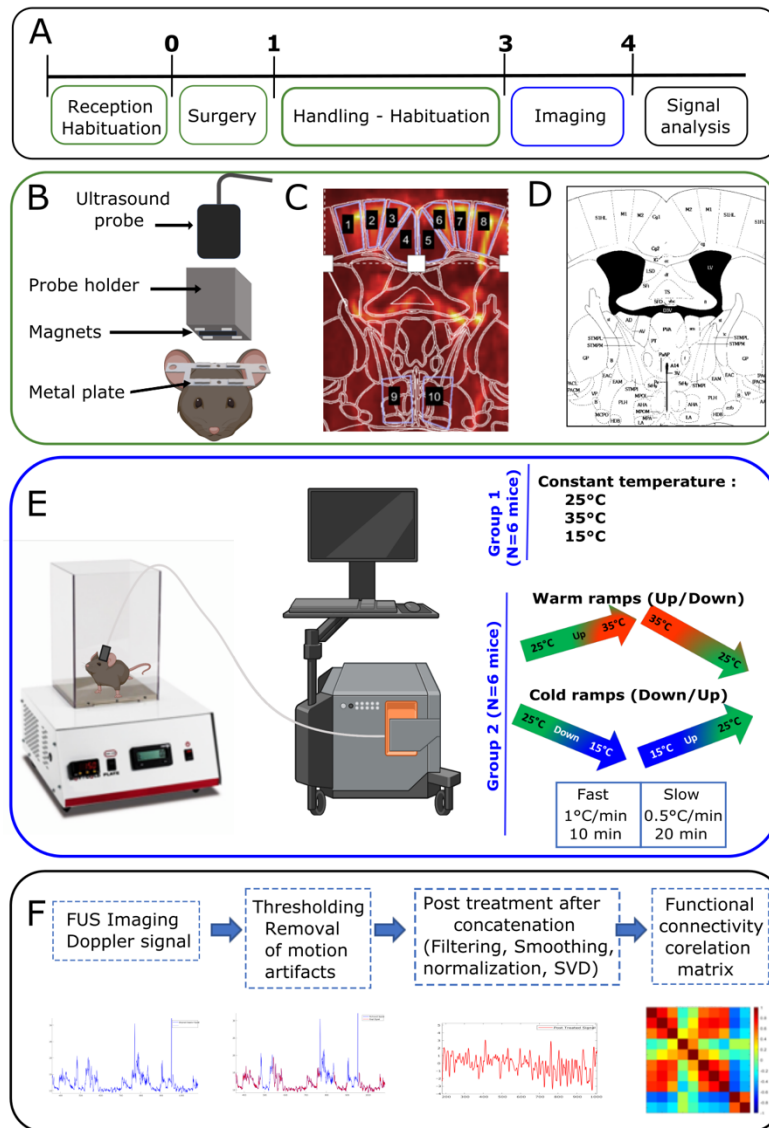

151  
 152 **Figure 1: Experimental design and timeline of the experiments**  
 153 A) One week after their arrival in the laboratory, a metal plate was surgically attached to the  
 154 mice skulls. After 3 days of recovery, mice were handled and habituated for 2 weeks. Imaging  
 155 was then performed for the next 2 weeks or more, depending on the quality of the skull and  
 156 on the well-being of the mice. (B) Schematic showing the metal plate, probe holder, fUS probe  
 157 and (C-D) plane of imaging (Bregma -0.34 mm). C shows the Doppler image superimposed  
 158 with the delimitation of the mouse brain atlas (D, Paxinos and Franklin, 2011). The regions  
 159 of interest are: 1,8 primary somatosensory cortex, hindlimb part, 2,3,7,8 primary and  
 160 secondary motor cortices, 4,5 Cingulate cortex and 9,10 Hypothalamus. (E). Experimental



161 setup with Bioseb and fUS Imaging (Iconeus). Mice were subjected to constant temperatures,  
162 or to warm and cold ramps at fast and slow pace. (F) The doppler signal obtained from  
163 imaging underwent thresholding to remove motion artefacts, concatenation, low-pass  
164 filtering, smoothing, normalization and SVD filtering. The cleaned doppler signal was then  
165 used for FC analysis.

166

## 167 **SURGICAL IMPLANTATION OF METAL PLATE**

168 Approximately one week after their arrival, the mice underwent surgery for the implantation  
169 of the metal plate (Tiran et al., 2017; Rabut et al., 2020). A mixture of ketamine (100 mg/kg)  
170 and medetomidine (1 mg/kg) was administered intraperitoneally and then the mouse was  
171 placed on a stereotaxic frame where the skull bone was exposed after skin and periosteum  
172 removal. The metal plate was fixed on the skull using Superbond C&B (Sun Medical, USA) and  
173 small screws minimally drilled in the skull. The field of interest was approximately 5mm  
174 wide, between the Bregma and Lambda points. The surgery took 45 to 60 minutes to be  
175 completed. Subcutaneous injections of atipamezole (1 mg/kg, Antisedan) and Metacam (5  
176 mg/kg/day) were given to reverse the anesthesia and to prevent postsurgical pain,  
177 respectively. A protective cap was mounted on the metal plate using magnets to protect the  
178 skull and to keep the field of imaging intact for 4-6 weeks (Bertolo et al., 2021). Altogether,  
179 the metal plate and the cap did not interfere with the normal daily activity of the mice. After  
180 a recovery period of 3 days, the mice proceeded towards the habituation phase.

181

## 182 **HABITUATION AND TRAINING**

183 After recovering from the metal plate implantation, the mice were subjected to an extensive  
184 habituation protocol. To make sure that the mice were not under any stress during the  
185 experiment, it was crucial that they were at ease with the user and the setup. They were  
186 initially handled by the user and then exposed to the Bioseb HC Plate. Their daily interaction  
187 time in the Bioseb apparatus was gradually increased from 15 minutes to 30 minutes, 1 hour,  
188 1 hour 30 minutes and finally 2 hours. Depending on the level of habituation of each mouse,  
189 the user practiced the protective cap removal, the skull cleaning using saline and application  
190 of echographic gel without anesthesia, by gently restricting the head movement. After each  
191 session, the mice received a reward. The process lasted 2 weeks and, depending upon the  
192 comfort level of the mice, we then proceeded to the imaging phase.

193

## 194 **EXPERIMENTAL PARADIGM**

195 The global aim of this study was to decipher how thermal sensations are encoded in the  
196 mouse brain. As intrinsic functional connectivity was shown to measure the activity and  
197 functionality of the brain networks, we postulated it could vary during exposure to cold,  
198 warm and neutral floor surfaces. To address this issue, we imaged the brain using fUS in  
199 awake and freely moving mice exposed to various thermal sensations (Figure 1 E).

200 We observed in previous experiments (Rabut et al., 2020) that motion artifacts deeply alter  
201 the quality of the ultrasound signals, and that all efforts need to be made to prevent these  
202 artifacts. In preliminary experiments, we have sought to establish the range of temperature  
203 in which the animals were minimally uncomfortable. Combining the records of the animal's  
204 natural behavior (grooming, exploration, urination and freezing) and measurements of

205 naturally emitted ultrasound vocalizations, we observed that, between 15°C and 35°C, the  
206 animals were minimally uncomfortable and the experiments feasible. Any residual of motion  
207 artifacts in the Doppler signal (due to head movements or behavioral movements such as  
208 grooming or licking) were removed using a dedicated signal processing as explained in  
209 Figure 1F.

210 We used the Bioseb 'Hot-Cold Plate' to conduct the experiments. The metal floor of the Bioseb  
211 equipment can be kept at a constant temperature, or heated or cooled down at different rates.

212 **i. Constant Temperature**

213 A constant floor temperature of 15°C (cold), 25°C (neutral) or 35°C (warm) was applied for  
214 20 minutes. Experiments at these temperatures were randomly repeated on two separate  
215 days. At the beginning of all sessions, the floor temperature was held at 25°C, and the  
216 transition to the desired temperature occurred within seconds.

217 **ii. Varying Temperature at fast or slow pace**

218 Floor temperature variations into the warm domain were made of two ramps, one up (from  
219 25°C to 35°C) and one down (back to 25°C); variations into the cold domain were made of a  
220 ramp down (from 25°C to 15 °C) and a ramp up (back to 25°C) (Figure1 E). In order to  
221 determine the effect of the speed of the temperature change, these ramps were performed at  
222 2 different rates: either at 0.5°C per minute (for 20 minutes) or at 1°C per minute (for 10  
223 minutes). The mice were reimaged at least 3 times. In order to avoid any bias due to the order  
224 of these variations, the order of warm and cold variations was randomized. They are denoted  
225 as follows:

226 **Cool Ramps:**

- 227 ■ **CFD**: Cool Fast Down: 25°C to 15 °C (- 1°C per minute)
- 228 ■ **CFU**: Cool Fast Up: 15°C to 25° (+ 1°C per minute)
- 229 ■ **CSD**: Cool Slow Down: 25°C to 15 °C (+ 0.5°C per minute)
- 230 ■ **CSU**: Cool Slow Up: 15°C to 25°C (- 0.5°C per minute)
- 231 **Warm Ramps**
- 232 ■ **WFU**: Warm Fast Up: 25°C to 35°C (+1°C per minute)
- 233 ■ **WFD**: Warm Fast Down: 35°C to 25°C (-1°C per minute)
- 234 ■ **WSU**: Warm Slow Up: 25°C to 35°C (+0.5°C per minute)
- 235 ■ **WSD**: Warm Slow Down: 35°C to 25°C (- 0.5°C per minute)

236

## 237 **TRANSCRANIAL AWAKE FUS IMAGING**

238 Three days prior to the first imaging session, the mice were anesthetized with isoflurane  
239 (1.5%). The respective probe holders were magnetically clipped to the metal plate. Real time  
240 transcranial Doppler images were acquired using the NeuroScan acquisition software  
241 (Inserm Technological Research Accelerator and Iconeus, Paris France), and the position of  
242 the probe was adjusted to select the Bregma -0.34 mm plane. The regions of interest included  
243 the primary somatosensory cortex of the hindlimb, the primary and the secondary motor  
244 cortex, the cingulate cortex and the hypothalamus (Figure 1 C-D). The skull was then  
245 thoroughly inspected and cleaned to avoid any infection. The mice were put back in their  
246 cages and imaged only 3 days later to avoid any interference with the isoflurane anesthesia.

247 Unlike the previous awake imaging protocols described in (Tiran et al., 2017), mice were not  
248 anesthetized to prepare the skull during the imaging phase. They were trained and  
249 accustomed to the detachment of the protective cap, to the cleaning of the skull with saline,  
250 and to the application of echographic gel with minimal force. They were then gently  
251 introduced into the Bioseb apparatus and the probe holder was attached to the implanted  
252 metal frame using the magnets on both pieces. Experiments began shortly after.

253 Real time vascular images were obtained by ultrafast compound doppler imaging technique  
254 (Deffieux et al., 2021). Eleven successive tilted plane waves ( $-10^\circ$  to  $+10^\circ$  with  $2^\circ$  steps) were  
255 used for insonification. Each image was obtained from 200 compounded frames acquired at  
256 500Hz frame rate corresponding to a 5.5 kHz pulse repetition frequency. The tissue signal  
257 was isolated from the cerebral blood volume signal using a spatio-temporal clutter filter  
258 based on the singular value decomposition (SVD) of raw ultrasonic data (Demene et al., 2015)  
259 to obtain a power Doppler image.

260

## 261 **DOPPLER SIGNAL ANALYSIS**

262 Imaging in awake mice required careful removal of motion artifacts due to head movements  
263 or behavioral movements such as grooming. We followed the analysis previously described  
264 in (Rabut et al., 2020) by first using a SVD clutter filter to separate blood motion from tissue  
265 motion, and then by thresholding tissue motion and Doppler signal to identify the frames  
266 with motion artifacts. Several thresholds were investigated by carefully examining the tissue  
267 motion signal and the threshold that removed most of the motion artifacts was chosen. We  
268 kept and concatenated epochs of at least 50 consecutive time points. The concatenated

269 cleaned frames were filtered using a low-pass filter with a cut-off frequency of 0.1 Hz to  
270 extract the steady-state. A polynomial fit of order 3 was applied to detrend the signal and,  
271 finally, global variations in the brain were suppressed by removing the first eigenvector of  
272 the dataset before connectivity analysis (Figure 1F). Acquisitions that did not match the  
273 aforementioned criteria (<50 consecutive timepoints) were discarded. Supplementary Table  
274 1 summarizes the identify of animals included in both parts of the study, and how many  
275 sessions from each mouse were kept. Out of the N=8 animals included in the constant  
276 experiments, N=8 acquisitions per experimental conditions were used in the analysis. As for  
277 the second part of the study (ramp experiments), they included 6 to 10 acquisitions  
278 (Supplementary Table 1), obtained in N=6 mice.

279

## 280 **STATISTICAL ANALYSES**

281 In order to understand the interactions between brain regions involved in the temperature  
282 coding, we performed static and dynamic FC analyses. In the two types of analyses, the  
283 following brain regions of the imaging plane were studied: Primary Somatosensory Hind  
284 Limb part, Primary and Secondary Motor, Cingulate and Hypothalamus (Figure 1 C, D). This  
285 imaging plane was chosen because of the known role of some of these regions in  
286 thermosensation and thermoregulation. Ten ROIs were defined based on the Paxinos Atlas  
287 (Paxinos, G and Franklin, 2012), numbered and coded as :

- 288 - 1 (S1HLL) & 8 (S1HLR) : primary somatosensory cortex left & right,
- 289 - 2 (M1L) & 7 (M1R) : primary motor cortex left & right,
- 290 - 3 (M2L) & 6 (M2R) : secondary motor cortex left & right,

- 291 - 4 (CgL) & 5 (CgR) : cingulate cortex left & right,  
292 - 9 (HyThL) & 10 (HyThR) : hypothalamus left & right.

293

## 294 **1) STATIC FC ANALYSIS**

295 In order to study the resting-state FC in the different thermal conditions, the post-treated  
296 time course of the cerebral blood volume (CBV) signal of the N=10 ROIs (Figure 1 C, D) were  
297 extracted. Simply stated, the temporal signal during the calm periods (without motion  
298 artefacts) was extracted from each ROI. The NxN Pearson correlation matrix of the ROI  
299 signals was computed over time. First, each correlation coefficient of the correlation matrix  
300 was individually compared between pairs of conditions. Since the measurements were not  
301 always independent (because of intra and inter group comparison, and of repeated  
302 measurements on some animals, see Supplementary Tables 1 and 3), these comparisons  
303 were made with linear mixed models having the animal as random effect factor, and the  
304 thermal condition as two-modality fixed effect factor, whose significance was tested. The  
305 correlation coefficients being Fisher-transformed, the parameter estimation was made using  
306 restricted maximum likelihood estimation, and the validity of the model was checked  
307 posteriori by testing the normality of its residuals with Shapiro-Wilk's test. Then, in order to  
308 account for multiple testing (a NxN correlation matrix involves  $Nx(N-1)/2 = 45$  correlation  
309 coefficients), we performed Benjamini-Hochberg's adjustment for multiple comparisons on  
310 the p-values of significance of the thermal condition effect. A false discovery rate of 0.05 was  
311 adopted.

312

## 313 **2) DYNAMIC FC ANALYSIS**

314 In order to study the dynamic behavior of FC, the above correlation matrices can be  
315 decomposed into the contribution of each time point, i.e. the co-fluctuation matrices  
316 [Esfahlani et al. 2020]. As a matter of fact, consider  $\mathbf{x}_i = [x_i(1) \dots x_i(T)]^T$  the time series of the  
317 CBV signal of ROI  $n^{\circ}i$ , and  $\mathbf{x}_j = [x_j(1) \dots x_j(N)]^T$  that of ROI  $n^{\circ}j$ . On one hand, the correlation  
318 coefficient between ROIs  $n^{\circ}i$  and  $j$  can be computed by first z-scoring each  $\mathbf{x}_i$  according to  $\mathbf{z}_i$   
319  $= (\mathbf{x}_i - m_i)/s_i$ , where  $m_i = 1/T \sum_t x_i(t)$  and  $s_i^2 = 1/(n-1) \sum_t (\mathbf{x}_i - m_i)^2$  are the empiric mean and  
320 variance of the time-series over time, and then by computing  $r_{ij} = \mathbf{z}_i^T \mathbf{z}_j / (T-1)$ . Hence a single  
321  $N \times N$  correlation matrix with only  $N \times (N-1) / 2 = 45$  elements of interest since the matrix  
322 symmetric with unit diagonal. On the other hand, it is possible to consider the element-wise  
323 product of  $\mathbf{z}_i$  and  $\mathbf{z}_j$  as encoding the magnitude of the moment-to-moment co-fluctuations  
324 between ROIs  $n^{\circ}i$  and  $j$ , and the 3D array of the  $N \times N$  couples of  $\mathbf{z}_i$  and  $\mathbf{z}_j$  as a time series of  $T$   
325 co-fluctuation matrices of size  $N \times N$ , each with only  $N \times (N+1) / 2 = 55$  elements of interest  
326 since the co-fluctuation matrices are symmetric.

327 To assess the repetitive nature of the dynamic characteristics of brain networks as a response  
328 to thermal inputs in an unsupervised fashion, we performed k-means clustering of the co-  
329 fluctuation matrices contributing to the static correlation matrices. The time series data from  
330 all 92 acquisitions on all animals were concatenated together to form a single time series of  
331  $T = 84\,499$  time points for each ROI, yielding a 3D array of size  $84\,499 \times 10 \times 10$ .

332 Prior to k-means clustering, outliers were removed. To this end, the  $84\,499 \times 84\,499$  L1  
333 distance matrix between co-fluctuation matrices considered as  $N \times (N+1) / 2$  vectors was  
334 computed, and the matrices with mean distance to the others larger than 3 were discarded,  
335 decreasing to  $T' = 83\,325$  the number of co-fluctuation matrices to be clustered. K-means  
336 clustering was performed on the  $T'$  remaining matrices considered as  $N \times (N+1) / 2$  vectors



337 using the L1 distance with k=3, 5, 6 and 7 clusters: for each value of k, to avoid local minima,  
338 the algorithm was run 500 times with random initializations of centroid positions, the  
339 configuration minimizing the total sum of intra-cluster distances being retained. Finally, each  
340 time point was assigned to a cluster (or brain state), resulting in a dynamic characterization  
341 of FC patterns. For each of the 4 choices of k, the occurrence rates of all brain states were  
342 calculated for each animal in all conditions. Prior to the comparison of these occurrence rates  
343 across thermal conditions, we checked the homogeneity of the animal distribution across the  
344 brain states (see Supplementary Table-2). In order to establish the significance of the effect  
345 of the thermal condition on the occurrence rate of each state, linear mixed models were used  
346 for the same reasons as for the elements of the correlation matrices (intra and inter group  
347 comparison, varying numbers of repeated measurements). As before, the animal was  
348 considered as a random effect factor, and the thermal condition as a fixed effect factor, this  
349 time with several modalities (the constant and varying temperature conditions). When the  
350 latter could be considered significant with a type I error risk of 5%, two-by-two comparisons  
351 were performed, and the corresponding p-values were adjusted using Benjamini-Hochberg's  
352 procedure, a false discovery rate of 0.05 being again adopted.

353

## 354 **RESULTS**

### 355 **Changes in brain functional connectivity during exposure to sustained neutral / warm** 356 **or cold floor surface**

357 In order to decipher the FC alterations in brain networks, which are indicators of dynamic  
358 changes in the brain, we developed an experimental setup based on a previously established

359 protocol on awake and freely moving mice (Rabut et al., 2020), but this time allowing the  
360 imaging during the application of varying floor temperatures (Figure 1).

361 In the first part, we investigated the potential changes of FC in cortical and hypothalamic  
362 areas located in the chosen imaging plane during 20 minutes of exposure to a constantly  
363 neutral (25°C), warm (35°C) or cold (15°C) floor. After removing motion artifacts and  
364 concatenating the cleaned signals, the time series were first analyzed in a stationary way, i.e.  
365 averaged over the recording sessions.

366 Exposure to constant floor temperature: 35°C (warm) and 15°C (cool) temperatures for 20  
367 minutes were compared to 25°C (neutral temperature). We observed large and statistically  
368 significant differences of FC between these conditions, with the largest number of significant  
369 differences for the cold (15°C) floor, for which the FC of 19 couples of ROI were statistically  
370 significantly different (Figure 2 A, B, C). Twelve of these pairs concerned areas of the somato-  
371 motor network (SMN), which had a stronger connectivity at 15°C than at 25°C (Figure 2 D).  
372 A single ROI pair, concerning cingulate and hypothalamus, exhibited an increase in  
373 connectivity at 15°C. The seven other pairs of ROI concerned areas between a ROI of the SMN  
374 and the hypothalamus (Figure 2 D). Interestingly, in these pairs, the FC was altered in the  
375 opposite way: the FC was significantly decreased (Figure 2 H, I).

376 Exposure to warm floors (35°C) induced mild changes of the brain FC (Figure 2 A, E, F). Only  
377 seven ROI pairs displayed a significant alteration of the FC. Two of these were pairs of the  
378 SMN, which displayed an increased FC (Figure 2 D). The five other ROI pairs concerned areas  
379 of the SMN and the hypothalamic nuclei (Figure 2 D). They all displayed the opposite effect:  
380 an increased FC when the mice were submitted to a warmer floor (Figure 2 J).

381 To conclude, for both temperatures (15°C and 35°C), when the floor temperature is constant,  
 382 the somato-motor regions display an increased connectivity, while the hypothalamic-  
 383 somato-motor network connectivity decreases. By taking a closer look, it was observed that  
 384 the connectivity between somato-motor network is higher at 15°C and 35°C than at 25°C, and  
 385 that the hypothalamic-somato-motor network anti-correlation was also higher at 15°C and  
 386 35°C than at 25°C.

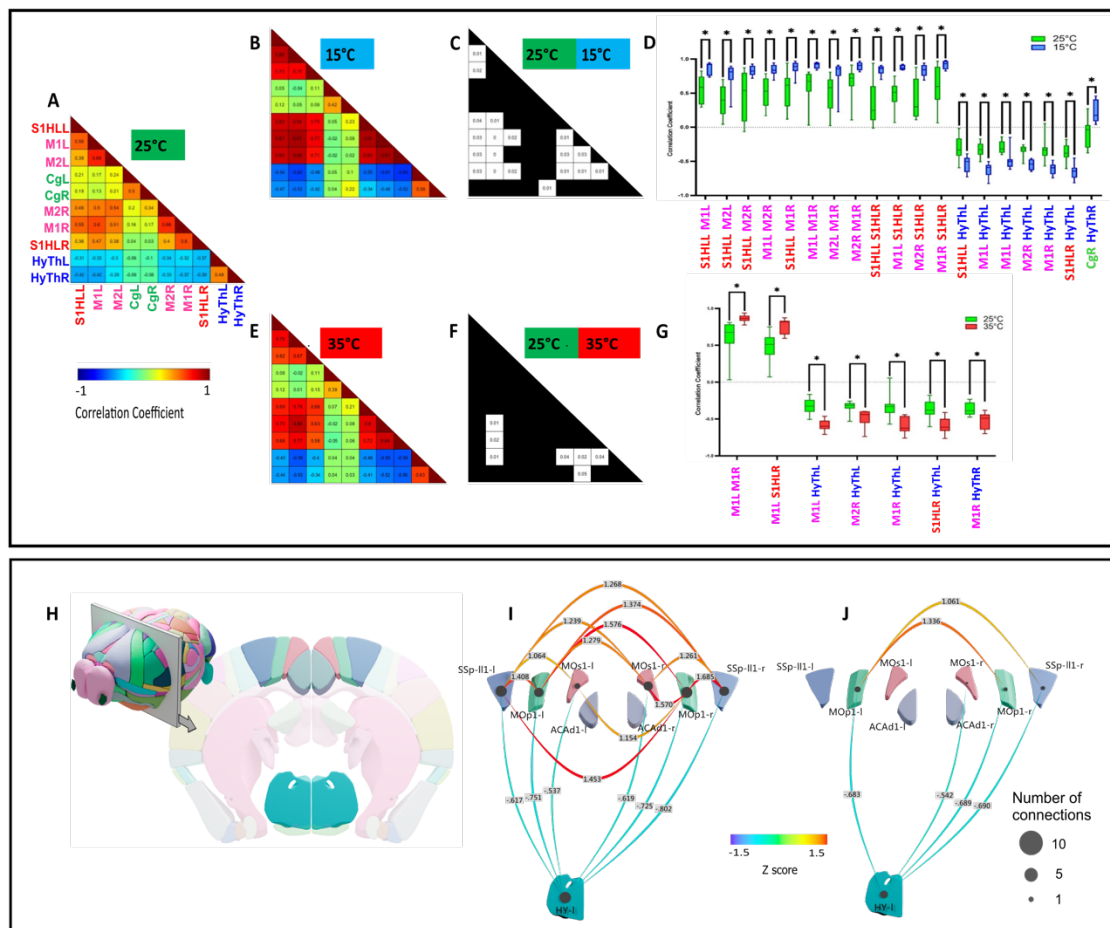

387  
 388 **Figure 2: Functional connectivity comparison between constant 15°C, 25°C and 35°C**  
 389 **using correlation matrices show striking differences between neutral (25°C) and cold**  
 390 **(15°C) rather than neutral and warm (35°C).**

391 A) Average Pearson correlation matrix of N=8 imaging sessions at 25°C. (B, E) Same for  
392 imaging sessions at 15°C (N=8) and 35°C (N=8) respectively. (C, F) Significance matrix  
393 indicating the ROI pairs with significant differences between 25°C and 15°C and 35°C  
394 respectively. In these matrices, ROI pairs with significant alterations (adjusted  $p < 0.05$ )  
395 between any two conditions are indicated by white squares with the corresponding p-value.  
396 (D, G) Boxplot representation of each ROI pair with a significant FC alteration between the  
397 conditions 25°C vs 15°C, and 25°C vs 35°C. \* $p < 0.05$ , \*\* $p < 0.01$  and \*\*\* $p < 0.001$  of linear  
398 mixed model analysis of the thermal condition effect, followed by Benjamini-Hochberg's  
399 correction for multiple comparisons. (H-J) Summary representation in form of graphs of the  
400 statistically significant changes between 25°C and 15°C (I) and 25°C and 35°C (J) shown as  
401 Z-scores between these conditions. (H) Schematic of the imaging plane Bregma -0.34 mm in  
402 relation to the 3D whole mouse brain. I: Imaging plane with the regions studied (SSpl1-l/r –  
403 primary somatosensory cortex of hindlimb S1HL, MOp1-l/r – primary motor cortex M1,  
404 MOs1-l/r – secondary motor cortex M2, ACAd1-l/r cingulate Cg and HY l/r Hypothalamus).

405

#### 406 **Alterations of the stationary FC during fast dynamic changes of temperature**

407 In order to decipher the neurobiological mechanism that takes place during dynamic changes  
408 of the temperature, we next compared the stationary FC during fast or slow, warm or cold  
409 ramps.

410 Warm Fast ramps did not lead to any significant FC difference compared to 25°C and 35°C  
411 conditions (Supplementary Figure 1). However, Down and Up Cold Fast ramps led to strong  
412 significant FC alterations compared to 25°C and 15°C conditions in numerous ROI pairs  
413 (Figure 3). The Cold Fast Ramps Down were the conditions that produced the largest number  
414 of statistically different ROIs, with 18 pairs of regions modified with respect to the neutral  
415 temperature (25°C), and 15 pairs when compared to the target temperature (15°C).

416 When compared to 25°C (Figure 3 A, B, C), 5 pairs of regions involving the cingulate and SMN,  
417 and 7 couples within the SMN displayed an increased FC when the temperature was lowered  
418 (Figure 3 D). The last 6 ROI pairs concerned the hypothalamus and SMN or the cingulate  
419 (Figure 3 D). They all had an initial anti-correlation at 25°C, which became even stronger  
420 when the floor became colder (Figure 3 D, O).

421 The comparison to constant 15°C floor temperature revealed 15 pairs of regions with  
422 significantly modified FC (Figure 3 A, E, F). Among them, 13 encompassed the SMN, where  
423 the FC increased when the floor temperature decreased (Figure 3 G). Two (intra-motor  
424 network and motor-S1HL) had the opposite behavior: slight but statistically significantly  
425 decreased FC (Figure 3 G). Finally, as shown in panel D of Figure 3, networks between the  
426 hypothalamus and the cingulate showed anticorrelations when the floor was getting colder  
427 (Figure 3 G).

428 Overall, these results suggest that a fast decrease in temperature is associated with a  
429 strengthening of the correlation of the somato-motor network, and a weakening of the link  
430 between the hypothalamus and the somato-motor network (Figure 3 O).

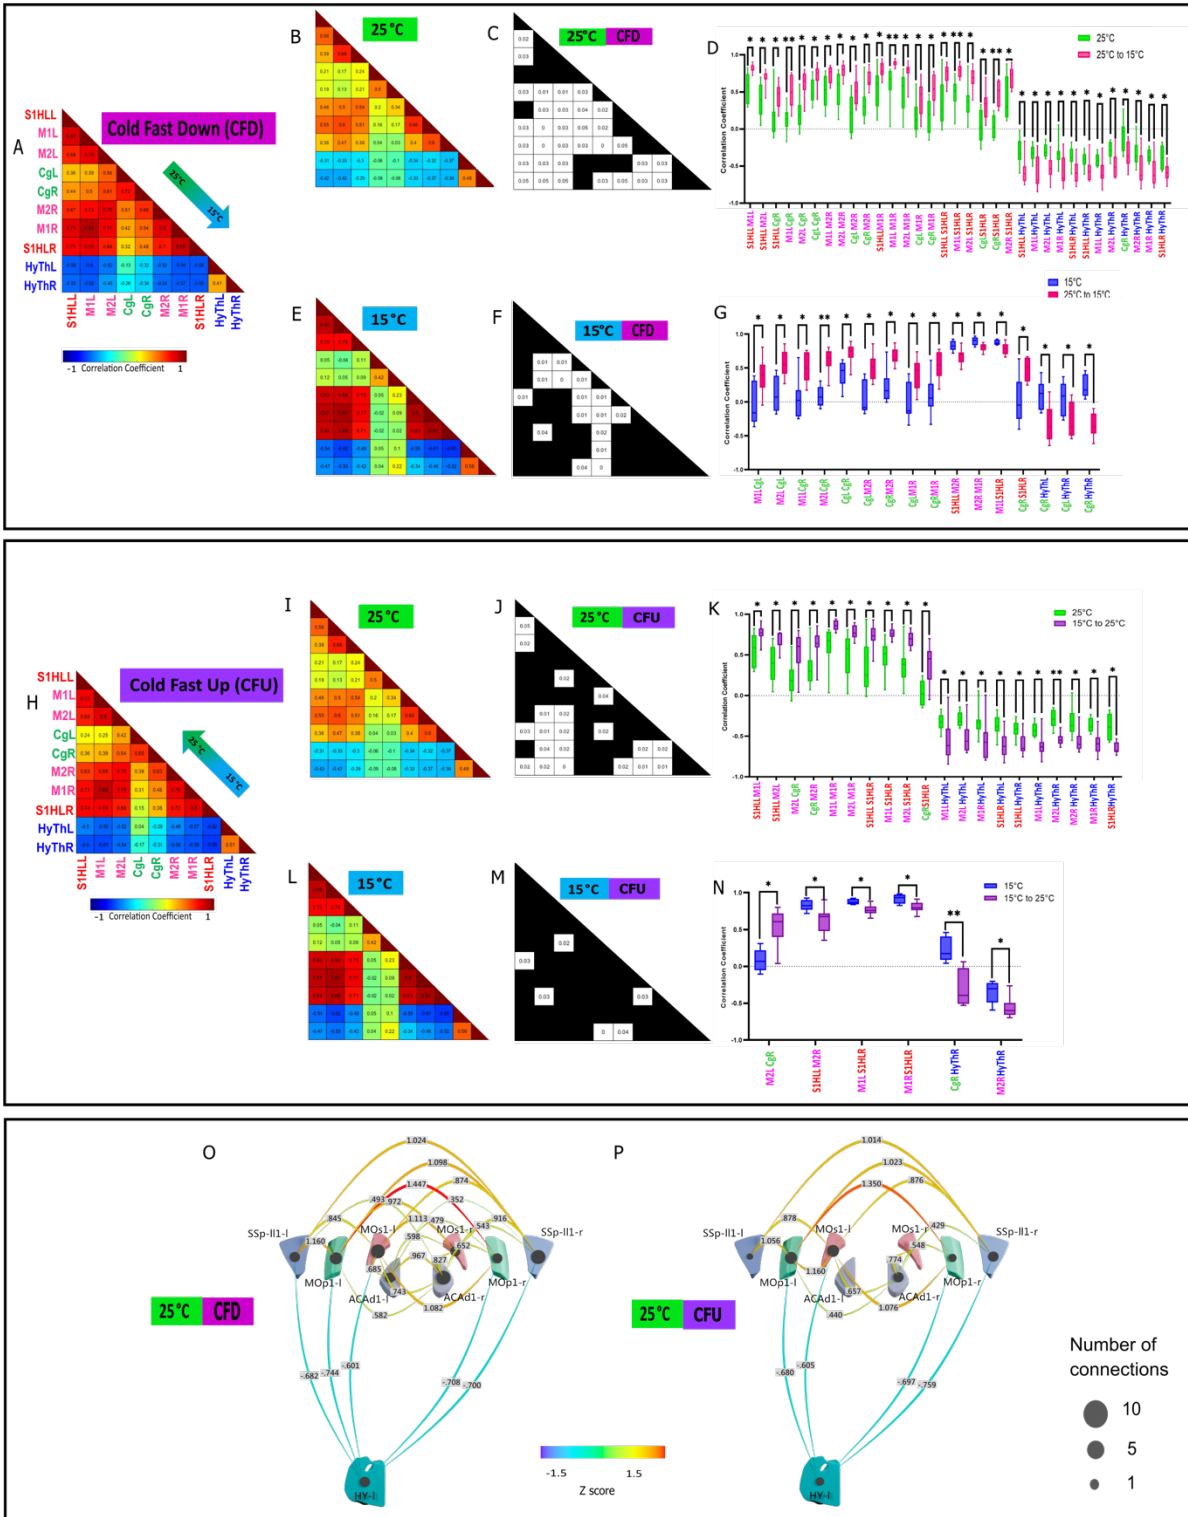

432 **Figure 3: Functional Connectivity comparison between the Cool Fast Down (25°C to**  
433 **15°C) and Cool Fast Up (15°C to 25°C) ramps on one hand, and 25°C and 15°C on the**  
434 **other hand.**

435 (A) Average Pearson correlation matrix of N=10 imaging sessions during Cool Fast Down. (B,  
436 E) Same for imaging sessions at constant 25°C and 15°C respectively. (C,F) Significance  
437 matrix indicating the ROI pairs with significant differences between 25°C and Cool Fast  
438 Down, and 15°C and Cool Fast Down respectively. (D,G) Boxplot representation of ROI pairs  
439 with a significant FC alteration between Cool Fast Down ramps, and 25°C and 15°C  
440 respectively. (H) Averaged Pearson correlation matrix of N=10 imaging sessions during Cool  
441 Fast Up. (I,L) Same for sessions at fixed 25°C and 15°C respectively. (J,M) Matrix indicating  
442 the ROI pairs with significant differences between Cool Fast Up ramps, and 25°C and 15°C  
443 respectively. (K,N) Boxplot representation of the ROI pairs with a significant FC alteration  
444 between Cool Fast Up and 25°C and 15°C respectively. \* $p < 0.05$ , \*\* $p < 0.01$  and \*\*\* $p < 0.001$   
445 of linear mixed model analysis of the thermal condition effect, followed by Benjamini-  
446 Hochberg's correction for multiple comparisons. (O, P) Summary representation in form of  
447 graphs of the statistically significant differences shown in C and J, i.e. Z-scores between the  
448 conditions: CFD vs 25°C (O) and CFU vs 25°C (P).

449  
450 The analysis of the Cold Fast ramp Up (Figure 3 H-N) showed a similar effect in a smaller  
451 number of regions. Compared to the target temperature (25°C), 5 pairs of regions within the  
452 SMN showed an increased FC during the ramp (Figure 3 J, K). Seven couples involving the  
453 hypothalamus and areas of the SMN displayed an increased anti-correlation of their FC  
454 (Figure 3 J, K). The comparison of this Fast-Cold Up ramp to the initial temperature (15°C)  
455 revealed that only 6 pairs of regions (Figure 3 M, N) differed significantly (4 within the SMN  
456 and 2 between the hypothalamus and the cingulate and motor cortex).

457 The striking difference between the two Cold Fast ramps (Down and Up) was the large  
458 number of subnetworks within the SM-cingulate networks in which the FC was reinforced.



459 In both cases (Up and Down), the hypothalamus-SM-cingulate networks which are slightly  
460 anti-correlated in neutral conditions, display a stronger anti-correlation during these ramps  
461 (Figure 3 O-P). These results highlight the complex inter-regional FC between the cingulate,  
462 somatosensory and motor cortices and hypothalamus during exposure to cold.

463

#### 464 **Effect of the rate of temperature change**

465 In order to further understand how changes of floor temperature are processed centrally, we  
466 also investigated the effect of the temperature change at a smaller rate of 0.5°C/min (20 min  
467 duration), called Cold Slow/ Warm Up/Down, that we compared with the fast ramp initially  
468 used (1°C/min, 10 min duration). We observe that, as hypothesized, these contrasting  
469 conditions produce strikingly different effects. As a matter of fact, the Warm Slow ramps only  
470 lead to slight FC alterations (Supplementary Figure 2).

471 Only 8 pairs of ROI were significantly different between the Cold Slow Down ramp and  
472 constant 25°C (Figure 4 A, B, C), which is roughly half of what we observed with the fast  
473 equivalent of this ramp. As observed with the fast-cold ramp, the modified ROI pairs  
474 concerned the SMN (in which the FC was reinforced), and the SMN and hypothalamus, where  
475 the anti-correlation was also reinforced (Figure 4 D).

476 As for the Cold Up ramp, in contrast with the aforementioned Cold Slow Down ramp and very  
477 similarly to the fast ramps, it displayed a large number of pairs of ROI modified. Most of them  
478 were within the SMN (12 out of 21 (Figure 4 F,G) with a strengthening of the FC between  
479 them. The anti-correlation between the hypothalamus and the SMN was significantly  
480 reinforced here (Figure 4 G), as observed in (Figure 3 D).



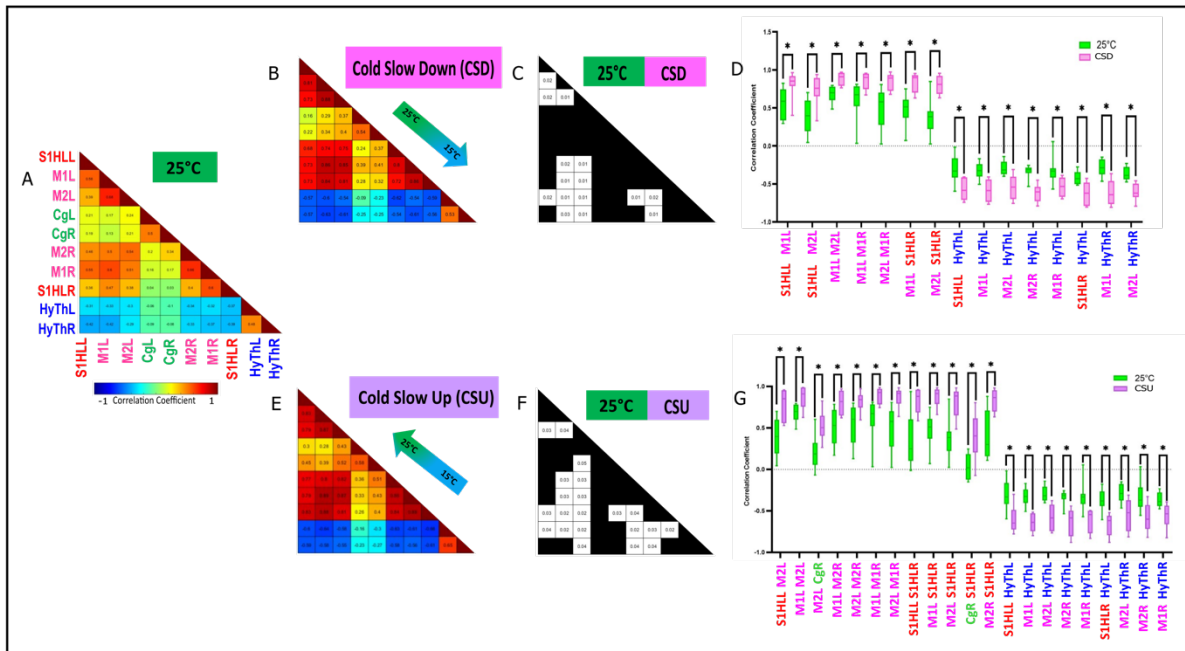

481

482 **Figure 4: Functional Connectivity comparison between the 25°C condition, and the**  
 483 **Cool Slow Down (25°C to 15°C) and Cool Up (15°C to 25°C) ramps.**

484  
 485 (A) Average Pearson correlation matrix of N=8 imaging sessions at 25°C. (B,E) Same for the  
 486 Cool Slow Down (N=8) and Cool Slow Up (N=6) imaging sessions. (C, F) Significativity matrix  
 487 indicating the ROI pairs with significant differences between 25°C with Cool Slow Down and  
 488 Cool Slow Up ramps respectively. (D, G) Boxplot representation of the ROI pairs with  
 489 significant FC alterations between 25°C and Cool Slow Down and Cool Slow Up ramps  
 490 respectively. \* $p < 0.05$ , \*\* $p < 0.01$  and \*\*\* $p < 0.001$  of linear mixed model analysis of the  
 491 thermal condition effect, followed by Benjamini-Hochberg's correction for multiple  
 492 comparisons.

493 In conclusion, the analysis of the effect of the rate of temperature change shows that the  
 494 larger the rate, the larger the number of ROI with statistically significant changes, especially  
 495 in the Cold Down ramps. Another important difference is the lack of significant differences  
 496 between these slow ramps and the constant low temperature of 15°C, suggesting that when

497 the ramp is slow, the overall central processing does not differentiate well between a cold  
498 floor and one that is slowly getting cooler.

499

## 500 **Dynamic FC**

501 The dynamic nature of the stimuli applied in this study and the rapid changes of brain states  
502 occurring in awake and conscious animals naturally led to the analysis of the dynamic  
503 connectivity. We predicted that the FC changes during thermal variations might be even  
504 stronger than the differences between warm and cold conditions.

505 In a previous study, we established that fUS imaging can robustly identify brain states  
506 extracted from k-means clustering of steady state fUS data in anesthetized rats (Rahal et al.,  
507 2020). In the current study, using a similar approach, but adapted to data discontinuity  
508 generated by artifact removal, we could robustly identify 5 consistent brain states using k-  
509 means with  $K=5, 6$  or  $7$  (Figure 5 A-C). As a matter of fact, whatever the value of  $k$ , the 5 states  
510 are not only reproducible, but also display a stable percentage of occurrence across time.  
511 Finally, the statistical effects observed in our experimental groups were consistently  
512 obtained (with mild variation for state 6).

513 First, the warm ramps did not produce any significant difference in FC compared to the  
514 constant temperatures (Supplementary figure 3). Among the brain states (identified with the  
515  $k=7$  algorithm and labeled 1 to 7, see Figure 5A), the strengths of the connections and the  
516 statistical results suggest four groups of states. The first group comprises state #1 only, which  
517 is by far the most frequent state (54–60% of the time, Figure 5A-C), has weak connections,

518 and is consistently more present at neutral temperature (constant 25°C) compared to all  
519 other experimental conditions (Figure 5A-B).

520 The second group is made up of states #3, #5 and #7 which are present 10-17% of the time  
521 are characterized by a common pattern of connectivity in the SM-cingulate (SM-Cg) cortex  
522 and an anti-correlation between the SM and the hypothalamic regions. Interestingly, these  
523 three states were significantly more frequent during the CFD ramp, compared to all constant  
524 temperatures.

525 The third group consisted of states #4 and #6. In addition to the dichotomy between the SM  
526 and hypothalamic networks, these states (present in 10-13% of the time) present are  
527 characterized by a low correlation between the cingulate and all other areas. Very  
528 interestingly, states #4 and #6 were consistently more frequent in one condition: the low  
529 constant temperature (15°C), suggesting a specific involvement of the cingulate cortex  
530 during this prolonged (20 minutes) exposure to cold.

531 Finally, the last group consisted in the single state 2, which was present 16-19% of the time  
532 and that was statistically equally represented in all experimental conditions.

533

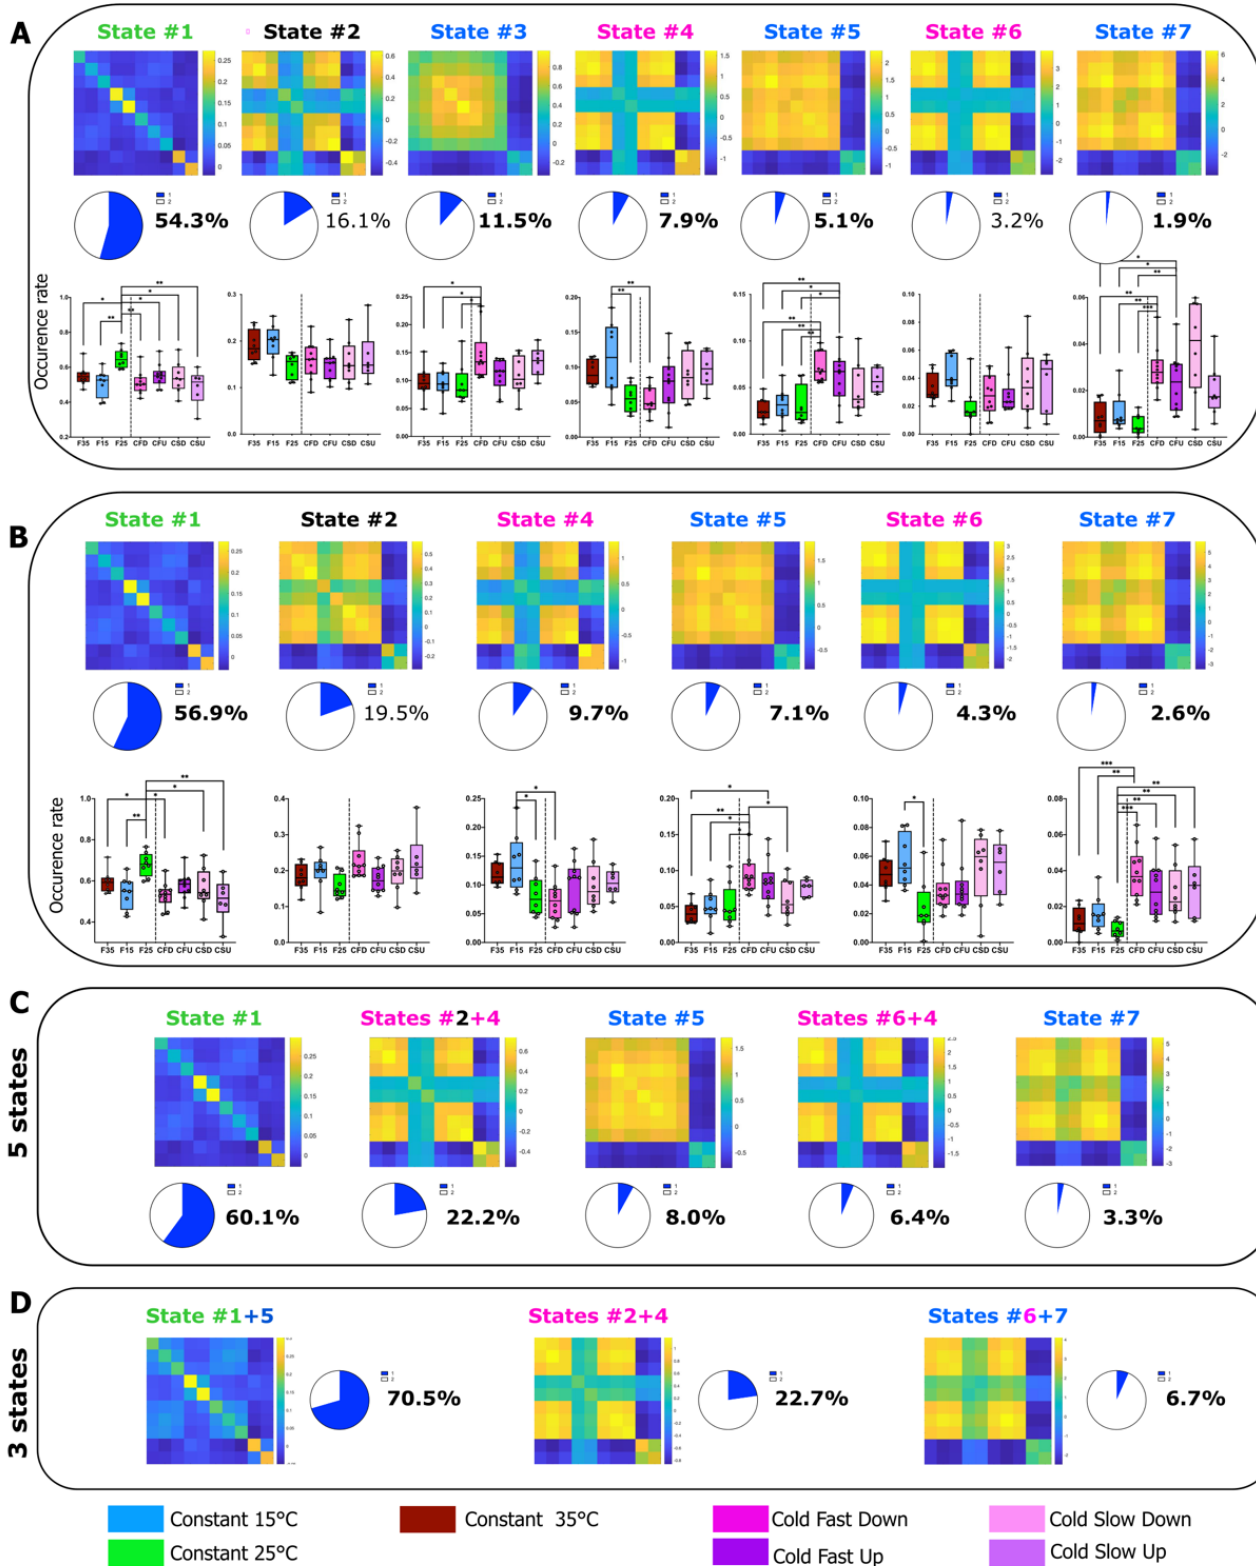

534

535

536 **Figure 5: Dynamic functional connectivity analysis of thermal coding using k-means**  
537 **clustering for either k=7, 6, 5 or 3.** (A) 7 brain state matrices (cofluctuation matrices) and  
538 (B) 6 brain state matrices were ordered according to their decreasing level of connectivity  
539 with their probability of occurrence in cold and neutral conditions, and significance of the  
540 thermal condition effect using linear mixed models. \* $p < 0.05$ , \*\* $p < 0.01$  and \*\*\* $p < 0.001$  of  
541 linear mixed model analysis of the thermal condition effect. Brain States #3, #5 and #7 show  
542 dichotomy between SM/Cg and hypothalamus and occur more often in Cold Fast Down  
543 ramps, whereas states #4 and #6 predominantly occur during sustained cold exposure and  
544 display a decreased connectivity between Cg and other regions. The weakly correlated state  
545 #1 is present in all thermal conditions, but its significantly more frequent in the 25°C  
546 condition. (C-D) k-means clustering of brain states into 5 and 3 states, respectively.

547

## 548 **DISCUSSION**

549 The peripheral and central neurophysiological mechanisms involved in thermal sensing have  
550 been at the heart of many studies since the last century. In the present study, we aimed at  
551 deciphering the interplay between the brain regions that are already shown to be crucial for  
552 thermal processing. Taking advantage of the sensitivity and versatility of fUS Doppler  
553 imaging in awake freely moving animals, we analyzed the stationary and dynamic changes of  
554 FC, an indirect marker of brain network functionality and dynamic characteristics. Despite  
555 the technical limitations of our approach, our study brings forward robust information  
556 regarding the complexity of interplay between the somato-motor and the hypothalamic brain  
557 networks.

558

559 **FC: A strong marker of strength of interaction between brain regions**

560 The analysis of intrinsic brain activity has led to the definition of resting brain state networks.  
561 Since then, the field of neuroscience has been widely studying these infra-slow oscillations,  
562 called functional connectivity (FC), that characterize the spatiotemporal organization and  
563 function of large-scale brain networks (Prete et al., 2017)(Prete et al., 2017). Interestingly, FC  
564 can be studied using very different approaches, such as fMRI, electrophysiology, MEG, fiber  
565 photometry, optical imaging and fUS (Pais-Roldán et al., 2021). Although the classical studies  
566 focused on resting state FC, task or behavior related FC studies using fMRI has also been  
567 increasing in numbers in the recent years (Barch et al., 2013; Cole et al., 2014; Di and Biswal,  
568 2019). Although the mice are not subjected to a task in our study, they are physiologically  
569 and behaviorally responding to the thermal stimulation which is either cold, warm or neutral.  
570 fUS has been previously shown to be able to measure FC in anesthetized rats (Osmanski et  
571 al., 2014b), task-evoked changes in FC (Ferrier et al., 2020), pharmacological studies in  
572 rodents (Rabut et al., 2020), but also altered FC in preterm babies (Baranger et al., 2021).  
573 Unlike the conventional analysis of time averaged FC that provides quantitative information  
574 on the correlation (or anti-correlation) between pairs of regions of interest (ROI) in the  
575 steady-state, there have been tremendous advancements in the study of the dynamic nature  
576 of FC (Hutchison et al., 2013; Prete et al., 2017). The temporal evolution of FC can reveal how  
577 FC reshapes according to the physiological (Tarun et al., 2021) or behavioral changes, at rest,  
578 or during a task, or in case of neurodegenerative or neuro-psychiatric illnesses (Tian et al.,  
579 2018; Barttfeld et al., 2019; Demertzi et al., 2019; Gu et al., 2020).

580

581 **Warm conditions do not elicit FC alterations**

582 The temperature conditions in the present study were carefully designed as not to induce  
583 any discomfort in the mice during awake imaging. Although 25°C falls in a slightly low  
584 temperature range, adaptation takes place before the beginning of the experiment and can  
585 be considered neutral. Thermal psychophysics studies have shown that, when the skin is  
586 adapted to temperature values ranging from ~30 to ~34°C, neither warm nor cool sensations  
587 are experienced (Filingeri, 2016). Furthermore, the transition from ambient to high  
588 temperature between 32-39°C and 26-34°C activates the TRPV3 and TRPV4 channels  
589 respectively. The TRPM2 channel is activated at approximately 35°C by sensing  
590 environmental temperatures (Tan and McNaughton, 2016). Therefore, it is likely that a  
591 temperature of 35°C would not either have evoked a significantly different response from  
592 that observed at neutral temperature.

593

594 **Dichotomy between somato-motor-cingulate and hypothalamic networks during**  
595 **exposure to cold**

596 In neutral conditions, the stationary FC indicated that, as previously demonstrated in fMRI in  
597 human (Zeng et al., 2012) and rodents (see for review (Pais-Roldán et al., 2021)), the SMN  
598 has a strong positive interhemispheric connectivity, that was shown previously to be due to  
599 a strong concomitant interhemispheric neuronal activity. Our study demonstrates a  
600 reinforcement in the somato-motor FC during cold sensing, mostly in the Cold Fast ramps.  
601 We hypothesize that such a FC increase is an indirect readout of the sensory discriminative  
602 aspect of cold sensing.

603 In contrast with this, the SM-hypothalamic network shows a decreased FC during cold  
604 sensing, suggesting a dichotomy between these two networks. A similar dramatic opposing  
605 effect was also observed when analyzing the dynamic FC. Indeed, the second type of dynamic  
606 modes reproducibly obtained in our analysis were the states 3, 5 and 7, which are  
607 characterized by a dichotomy between a strongly correlated signal within the SM-Cg network  
608 and an anti-correlation in the SM-hypothalamic network. These three modes, which account  
609 for approximately 10-17% of the time, have a higher occurrence during the Cold Fast Down  
610 ramp. The significant differences with other conditions, including the Cold Slow Down ramps  
611 and the constant cold condition (15°C), suggest that this dichotomy is a specific feature of  
612 cold sensing.

613

#### 614 **Weakly connected dynamic mode in thermal sensing**

615 By measuring the temporal fluctuations in FC, we were able to identify the dynamic patterns  
616 using k-means clustering. The results were robust for k=5, 6, 7, the nature of the states and  
617 the statistical effects observed being similar whatever k. These states, that we named 1 to 7  
618 (clustering with k=7), encompass different neurobiological meaning and role.

619 The first group of states consists of state #1 alone. As previously described in monkeys  
620 (Barttfeld et al., 2019) and human subjects (Demertzi et al., 2019) using the same type of  
621 analysis but in fMRI, the most frequent dynamic state (50-60% of the recording time) is a  
622 mode characterized by weak strengths of connection. Our current understanding of this state  
623 is that it is associated with low-level cognitive functions (Barttfeld et al., 2019; Demertzi et  
624 al., 2019). In our study, while present in the majority of all experimental groups, it is



625 statistically more frequent when the animals were exposed to the neutral temperature of  
626 25°C. This result reinforces previous suggestions of low FC, apart from the default mode  
627 network during resting periods.

628

### 629 **A secondary pathway involving hypothalamus**

630 The hypothalamus was anti-correlated to the somato-motor network in all conditions and  
631 the strength of this anti-correlation was the highest during cold sensing. This dramatic effect  
632 was revealed in both stationary and dynamic FC analysis. Although the preoptic anterior  
633 hypothalamus (POAH) has been linked to thermoregulatory behavior (Ishiwata et al., 2002;  
634 Wang et al., 2019), the secondary thermosensory pathway from dorsal horn to the lateral  
635 parabrachial nucleus (LPB) and then to the preoptic area (POA) of the hypothalamus has  
636 been put forward by (Yahiro et al., 2017). Using selective lesions of either thalamic nuclei or  
637 the POA and the LPB, they unraveled an important role of these nuclei in thermoregulatory  
638 behaviors (Yahiro et al., 2017). Our hypothesis is that the changes observed in the  
639 hypothalamus in our study are linked to this role in thermoregulation.

640 Only a small number of FC studies in rodents are documenting networks involving  
641 hypothalamic nuclei. In the rare cases doing so, they define them as the ‘ventral midbrain’  
642 (Liska et al., 2015) or the ‘basal ganglia-hypothalamus’ (Becerra et al., 2011). In agreement  
643 with our observations, these networks are different from the sensory network (Hutchison et  
644 al., 2010; Zerbi et al., 2015). If we postulate that this anti-correlation is due to a decrease in  
645 neuronal activity, this second structure would have an inhibitory action on hypothalamic  
646 neurons. However, this anti-correlation can also be due to a time lag between signals of the

647 SMN and the hypothalamic. In this last case, the hypothesized structure(s) would only change  
648 the temporal shift, without affecting the intensity of neuronal activity.

649

650 **Sustained cold and cold ramps are encoded differentially in the cingulate cortex**

651 As previously described by us and by others (Osmanski et al., 2014b; Liska et al., 2015; Zerbi  
652 et al., 2015), correlation between regions of the SMN and the cingulate cortex was much  
653 weaker, as it belongs to the default mode network (Liska et al., 2015). During Fast Cooling,  
654 interhemispheric connectivity within the cingulate cortices increased significantly, as well as  
655 the connectivity between the SM and the cingulate cortices. When the cold ramp was slow,  
656 however, the FC between these regions was not affected. The thermal psychophysics  
657 associated with rapid temperature changes and the already established role of the cingulate  
658 cortices in affective responses to unpleasant or nociceptive thermal sensations (Craig et al.,  
659 1996; Becerra et al., 1999; Brooks et al., 2002; Derbyshire et al., 2002) has led us to consider  
660 that the concomitant FC increase between SM and cingulate cortex suggests a common hub  
661 between the two.

662 In the dynamic brain states #4 and #6, on the other hand, the cingulate cortex is differently  
663 connected to the other networks during static exposure to a lower temperature (15°C). The  
664 decrease in connectivity with the somato-motor network in this state seems to be a  
665 characteristic of sustained exposure to cold, and this suggests the differential role of cingulate  
666 in sensing persistent cold sensations and cold ramps.

667

668

669 **Supplementary Figures**

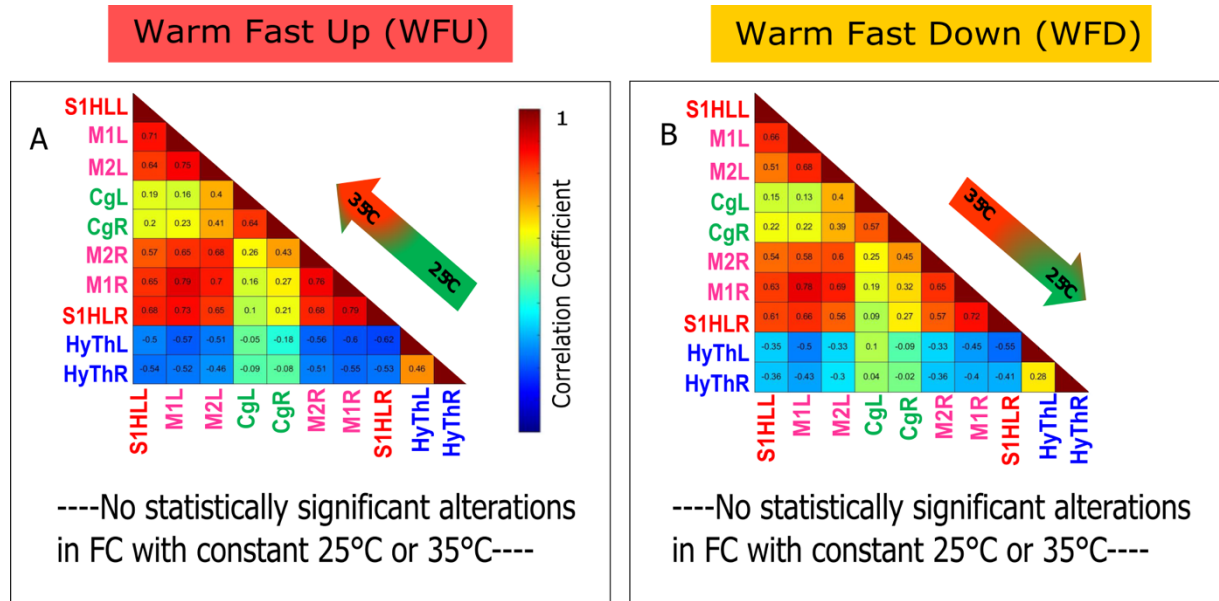

670

671 **Supplementary figure 1: No changes in functional connectivity are observed between**  
 672 **Warm Fast Up, Down ramps and either 35°C or 25°C conditions using correlation**  
 673 **matrices.**

674 (A, B) Averaged Pearson correlation matrices of WFU (N=8) and WFD (N=8) imaging  
 675 sessions. (C, E). Average Pearson correlation matrix of N=8 imaging sessions at 25°C. No  
 676 significant FC alteration was observed.

677

678

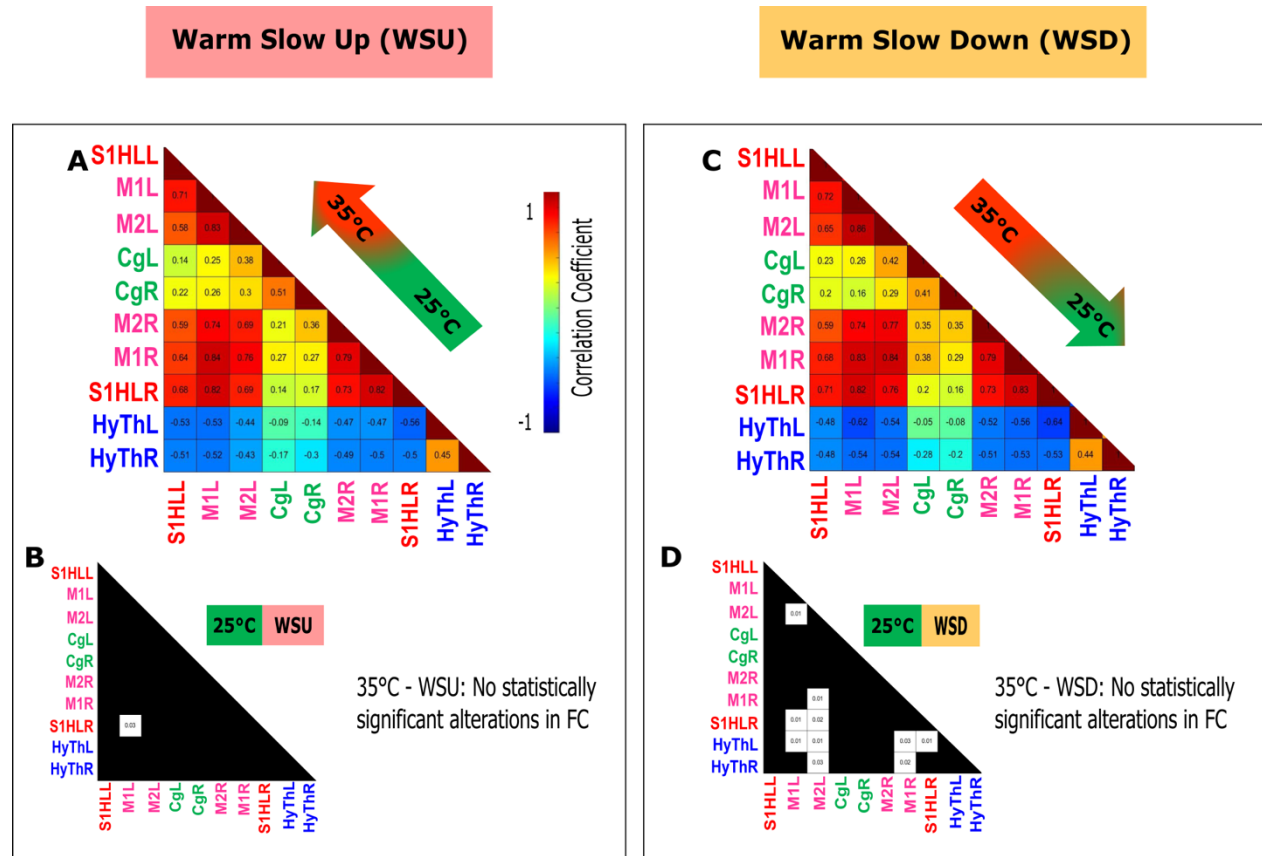

679  
680 **Supplementary Figure 2: Functional connectivity comparison of Warm, Slow Up (A, B)**  
681 **and Slow Down ramps (C, D) with 35°C and 25°C conditions using correlation matrices**  
682 **show limited changes.**

683 (A, C) Average Pearson correlation matrices during WSU (N=8) and WSD (N=8) imaging  
684 sessions. (B, D) Matrix indicating the ROI pairs with significant differences between WSU and  
685 25°C and WSD and 25°C respectively. No statistical differences were observed between the  
686 constant 35°C temperature and the conditions WSU and WSD.

687

688

689

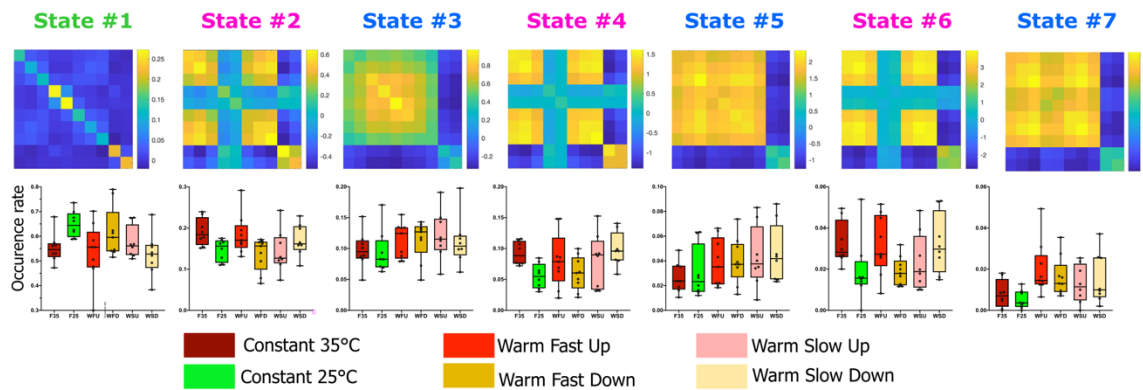

690

691 **Supplementary Figure 3:** Lack of statistical difference in the occurrence rate of the various  
692 dynamic functional connectivity states in warm experiments (constant and ramps). As  
693 presented in figure 5, dynamic functional connectivity was analyzed using k-means  
694 clustering with  $k=7$ , which are ordered from 1 to 7 in the order of decreasing occurrence  
695 rate. The frequency of occurrence was calculated for each brain state for all thermal  
696 conditions. No significant difference could be established using a linear mixed model analysis  
697 of the thermal condition.

698

699

700

701

702

703

704

705

706

707 **Supplementary Table 1:** Reporting of included animals and their number of imaging  
708 sessions.

I. **Number of imaging sessions kept in constant temperature experiments**

| Nb Mouse              | Constant 25°C | Constant 15°C | Constant 35°C |
|-----------------------|---------------|---------------|---------------|
| M401                  | 1             | 1             | 1             |
| M402                  | 1             | 2             | 1             |
| M403                  | 2             | 2             | 2             |
| M404                  | 1             | 2             | 2             |
| M405                  |               |               | 1             |
| M406                  | 1             | 1             | 1             |
| M302                  | 1             |               |               |
| M304                  | 1             |               |               |
| <b>Total sessions</b> | <b>8</b>      | <b>8</b>      | <b>8</b>      |

II. **Number of imaging sessions kept in Ramp experiments**

|                       | Cold Fast Down | Cold Fast Up | Cold Slow Down | Cold Slow Up |
|-----------------------|----------------|--------------|----------------|--------------|
| M501                  | 3              | 3            | 3              | 3            |
| M502                  | 3              | 3            |                |              |
| M503                  | 2              | 2            | 2              | 1            |
| M504                  |                |              |                |              |
| M505                  | 2              | 2            | 3              | 2            |
| M506                  |                |              |                |              |
| <b>Total sessions</b> | <b>10</b>      | <b>10</b>    | <b>8</b>       | <b>6</b>     |

|                       | Warm Fast Down | Warm Fast Up | Warm Slow Down | Warm Slow Up |
|-----------------------|----------------|--------------|----------------|--------------|
| M501                  | 3              | 3            | 3              | 3            |
| M502                  | 2              | 2            |                |              |
| M503                  | 2              | 2            | 2              | 2            |
| M504                  |                |              |                |              |
| M505                  | 2              | 2            | 3              | 3            |
| M506                  |                |              |                |              |
| <b>Total sessions</b> | <b>9</b>       | <b>9</b>     | <b>8</b>       | <b>8</b>     |

**Supplementary Table 1:** Table presenting the mice (M) included in each part of the study and the number of sessions kept for each one of them. The numbers indicate how many sessions of each mouse was kept.

The number following 'M' is the mouse number. Ex/ M401: Mouse #401.

Grey boxes: due to artifacts, the signals obtained for this recording was too noisy and had therefore to be discarded (see materials and methods).

709

## Supplementary Table 2: Distribution of the different animals in the various brain states (related to Figure 5)

### 6 states

| Mouse # | State1      | State2      | State3      | State4      | State5      | state6      |
|---------|-------------|-------------|-------------|-------------|-------------|-------------|
| M302    | 0,010779897 | 0,011388942 | 0,005062993 | 0,01758794  | 0,003673354 | 0,006692694 |
| M304    | 0,013001708 | 0,007189667 | 0,005180737 | 0,004638578 | 0,003108223 | 0,000557724 |
| M401    | 0,031599087 | 0,030412929 | 0,029671494 | 0,03614225  | 0,02627861  | 0,029001673 |
| M402    | 0,043263593 | 0,044983139 | 0,041563641 | 0,031117124 | 0,029669398 | 0,023424428 |
| M403    | 0,070460203 | 0,045746644 | 0,075827152 | 0,02995748  | 0,06301215  | 0,021751255 |
| M404    | 0,059639161 | 0,069160781 | 0,090074179 | 0,0618477   | 0,097485165 | 0,045175683 |
| M405    | 0,016889876 | 0,016351721 | 0,016719651 | 0,012756088 | 0,014693416 | 0,01115449  |
| M406    | 0,037379909 | 0,035948336 | 0,055104203 | 0,021453421 | 0,058208533 | 0,012269939 |
| M501    | 0,268674525 | 0,286505058 | 0,233721889 | 0,302860456 | 0,252896298 | 0,321807027 |
| M502    | 0,101524409 | 0,096837819 | 0,055810668 | 0,118283726 | 0,062447019 | 0,149470162 |
| M503    | 0,129153038 | 0,135903798 | 0,14600259  | 0,141669888 | 0,149194688 | 0,158951478 |
| M505    | 0,217634594 | 0,219571165 | 0,245260803 | 0,22168535  | 0,239333145 | 0,219743447 |

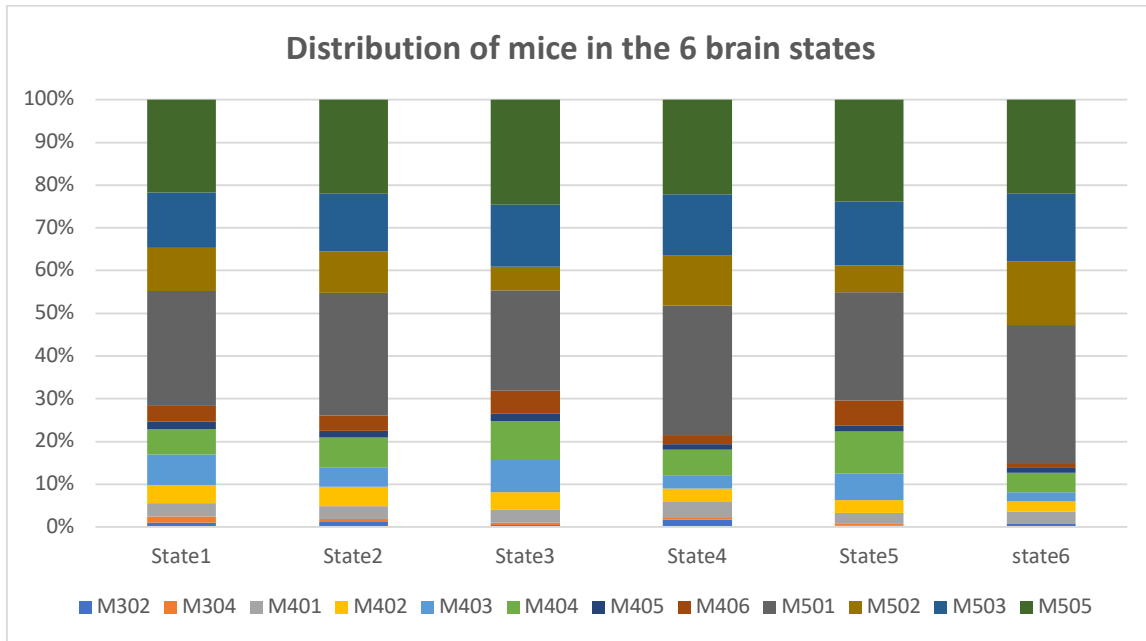

### 7 states

| Mouse # | State1      | State2      | State3      | State4      | State5      | state6      | state7      |
|---------|-------------|-------------|-------------|-------------|-------------|-------------|-------------|
| M302    | 0,011027972 | 0,007068178 | 0,015777611 | 0,005087949 | 0,014567035 | 0,004744958 | 0,008227375 |
| M304    | 0,013203115 | 0,006700044 | 0,008264463 | 0,004070359 | 0,003237119 | 0,003954132 | 0           |
| M401    | 0,03175708  | 0,031733176 | 0,032628528 | 0,025003634 | 0,035878069 | 0,023329379 | 0,029169783 |
| M402    | 0,043307087 | 0,049403622 | 0,037458409 | 0,038377671 | 0,024817912 | 0,030046817 | 0,020194465 |
| M403    | 0,06977857  | 0,064276248 | 0,038639047 | 0,072684983 | 0,020231994 | 0,06405694  | 0,020194465 |
| M404    | 0,057837038 | 0,083713739 | 0,059568531 | 0,089693269 | 0,058807661 | 0,101621194 | 0,04038893  |
| M405    | 0,016661591 | 0,017449566 | 0,016743587 | 0,014973107 | 0,012948476 | 0,014234875 | 0,008975318 |
| M406    | 0,036933919 | 0,046016787 | 0,026188687 | 0,056548917 | 0,019422714 | 0,060498221 | 0,005983545 |
| M501    | 0,269913429 | 0,269032543 | 0,277449823 | 0,251926152 | 0,31211222  | 0,235666271 | 0,33881825  |
| M502    | 0,10442859  | 0,076719187 | 0,103788773 | 0,053496148 | 0,132452118 | 0,061289047 | 0,155572177 |
| M503    | 0,129399226 | 0,130245914 | 0,146077063 | 0,146823666 | 0,139465875 | 0,158165283 | 0,145100972 |
| M505    | 0,215752382 | 0,217640995 | 0,237415477 | 0,241314144 | 0,226058808 | 0,241992883 | 0,22737472  |

711

### Supplementary Table 3: Statistical results of the mixed linear model.

| 7 states   |           |         |        |            |          |            |           |            |           |         |        |            |            |  |  |
|------------|-----------|---------|--------|------------|----------|------------|-----------|------------|-----------|---------|--------|------------|------------|--|--|
| State 1    |           | State 2 |        | State 3    |          | State 4    |           | State 5    |           | State 6 |        | State 7    |            |  |  |
|            |           |         |        |            |          |            |           |            |           |         |        |            |            |  |  |
| State 1    | Pvalue    | State 2 | Pvalue | State 3    | Pvalue   | State 4    | Pvalue    | State 5    | Pvalue    | State 6 | Pvalue | State 7    | Pvalue     |  |  |
| T35 vs T25 | 0.028923  |         |        | T35 vs CFD | 0.023197 | T15 vs T25 | 0.0053255 | T35 vs CFD | 0.0018622 |         |        | T35 vs CFD | 0.0010095  |  |  |
| T15 vs T25 | 0.0030123 |         |        | T15 vs CFD | 0.018167 | T15 vs CFD | 0.0053255 | T35 vs CFU | 0.0095948 |         |        | T35 vs CFU | 0.014969   |  |  |
| T25 vs CFD | 0.0037124 |         |        | T25 vs CFD | 0.018167 |            |           | T35 vs CSU | 0.040352  |         |        | T35 vs CSD | 0.048972   |  |  |
| T25 vs CFU | 0.036529  |         |        |            |          |            |           | T15 vs CFD | 0.0034579 |         |        | T35 vs CSU | 0.039508   |  |  |
| T25 vs CSD | 0.042096  |         |        |            |          |            |           | T15 vs CFU | 0.028186  |         |        | T15 vs CFD | 0.0035432  |  |  |
| T25 vs CSU | 0.0037124 |         |        |            |          |            |           | T25 vs CFD | 0.003143  |         |        | T15 vs CFU | 0.037493   |  |  |
|            |           |         |        |            |          |            |           | T25 vs CFU | 0.022591  |         |        | T25 vs CFD | 0.00031661 |  |  |
|            |           |         |        |            |          |            |           |            |           |         |        | T25 vs CFU | 0.0036998  |  |  |
|            |           |         |        |            |          |            |           |            |           |         |        | T25 vs CSD | 0.01832    |  |  |
|            |           |         |        |            |          |            |           |            |           |         |        | T25 vs CSU | 0.016621   |  |  |

| 6 states   |           |         |        |            |          |            |           |            |          |            |            |
|------------|-----------|---------|--------|------------|----------|------------|-----------|------------|----------|------------|------------|
| State 1    |           | State 2 |        | State 3    |          | State 4    |           | State 5    |          | State 6    |            |
|            |           |         |        |            |          |            |           |            |          |            |            |
| State 1    | Pvalue    | State 2 | Pvalue | State 3    | Pvalue   | State 4    | Pvalue    | State 5    | Pvalue   | State 6    | Pvalue     |
| T35 vs T25 | 0.041336  |         |        | T15 vs T25 | 0.033361 | T35 vs CFD | 0.0050448 | T15 vs T25 | 0.013455 | T35 vs CFD | 0.00029407 |
| T15 vs T25 | 0.0016305 |         |        | T15 vs CFD | 0.023406 | T35 vs CFU | 0.01535   |            |          | T35 vs CFU | 0.014855   |
| T25 vs CFD | 0.0016305 |         |        |            |          | T15 vs CFD | 0.01535   |            |          | T35 vs CSD | 0.032581   |
| T25 vs CFU | 0.029618  |         |        |            |          | T25 vs CFD | 0.01535   |            |          | T35 vs CSU | 0.018216   |
| T25 vs CSD | 0.029618  |         |        |            |          | CFD vs CSD | 0.01535   |            |          | T15 vs CFD | 0.0026806  |
| T25 vs CSU | 0.0019494 |         |        |            |          |            |           |            |          | T25 vs CFD | 4.6762e-05 |
|            |           |         |        |            |          |            |           |            |          | T25 vs CFU | 0.0030647  |
|            |           |         |        |            |          |            |           |            |          | T25 vs CSD | 0.0074009  |
|            |           |         |        |            |          |            |           |            |          | T25 vs CSU | 0.0046891  |

712

713



714 **Data availability statement**

715 Source data are available on the repository website Dryad using the following link:

716 <https://doi.org/10.5061/dryad.mkkwh713t>.

717

718 **Code availability statement**

719 Classical codes used to generate the results are available in the following depository:

720 <https://doi.org/10.5061/dryad.mkkwh713t>. Custom codes used for the analysis of fUS data

721 used in this study are protected by INSERM.

722

723

724

## References

725 Bandell M, Story GM, Hwang SW, Viswanath V, Eid SR, Petrus MJ, Earley TJ, Patapoutian A  
726 (2004) Noxious Cold Ion Channel TRPA1 Is Activated by Pungent Compounds and  
727 Bradykinin. *Neuron* 41:849–857.

728 Baranger J, Demene C, Frerot A, Faure F, Delanoë C, Serroune H, Houdouin A, Mairesse J, Biran  
729 V, Baud O, Tanter M (2021) Bedside functional monitoring of the dynamic brain  
730 connectivity in human neonates. *Nat Commun* 12:1080.

731 Barch DM et al. (2013) Function in the human connectome: Task-fMRI and individual  
732 differences in behavior. *NeuroImage* 80:169–189.

733 Barttfeld P, Sitt JD, Fernández-Espejo D, Tagliazucchi E, Owen AM, Schiff ND, Rohaut B,  
734 Demertzi A, Naccache L, Raimondo F, Laureys S, Martial C, Deco G, Dehaene S, Voss HU  
735 (2019) Human consciousness is supported by dynamic complex patterns of brain  
736 signal coordination. *Science Advances* 5:eaat7603.

737 Bautista DM, Siemens J, Glazer JM, Tsuruda PR, Basbaum AI, Stucky CL, Jordt S-E, Julius D  
738 (2007) The menthol receptor TRPM8 is the principal detector of environmental cold.  
739 *Nature* 448:204–208.

740 Becerra L, Pendse G, Chang PC, Bishop J, Borsook D (2011) Robust reproducible resting state  
741 networks in the awake rodent brain. *PLoS ONE* 6.

742 Becerra LR, Breiter HC, Stojanovic M, Fishman S, Edwards A, Comite AR, Gonzalez RG,  
743 Borsook D (1999) Human brain activation under controlled thermal stimulation and  
744 habituation to noxious heat: An fMRI study. *Magn Reson Med* 41:1044–1057.

745 Bergel A, Deffieux T, Demené C, Tanter M, Cohen I (2018) Local hippocampal fast gamma  
746 rhythms precede brain-wide hyperemic patterns during spontaneous rodent REM  
747 sleep. *Nat Commun* 9:5364.

748 Bergel A, Tiran E, Deffieux T, Demené C, Tanter M, Cohen I (2020) Adaptive modulation of  
749 brain hemodynamics across stereotyped running episodes. *Nat Commun* 11:6193.

750 Bertolo A, Nouhoum M, Cazzanelli S, Ferrier J, Mariani J-C, Kliewer A, Belliard B, Osmanski B-  
751 F, Deffieux T, Pezet S, Lenkei Z, Tanter M (2021) Whole-Brain 3D Activation and  
752 Functional Connectivity Mapping in Mice using Transcranial Functional Ultrasound  
753 Imaging. *JoVE (Journal of Visualized Experiments):e62267*.

754 Bimbard C, Demene C, Girard C, Radtke-Schuller S, Shamma S, Tanter M, Boubenec Y (2018)  
755 Multi-scale mapping along the auditory hierarchy using high-resolution functional  
756 UltraSound in the awake ferret King AJ, ed. *eLife* 7:e35028.

- 757 Boido D, Rungta RL, Osmanski BF, Roche M, Tsurugizawa T, Le Bihan D, Ciobanu L, Charpak  
758 S (2019) Mesoscopic and microscopic imaging of sensory responses in the same  
759 animal. *Nature Communications*.
- 760 Brooks JCW, Nurmikko TJ, Bimson WE, Singh KD, Roberts N (2002) fMRI of Thermal Pain:  
761 Effects of Stimulus Laterality and Attention. *NeuroImage* 15:293–301.
- 762 Bushnell MC, Duncan GH, Tremblay N (1993) Thalamic VPM nucleus in the behaving monkey.  
763 I. Multimodal and discriminative properties of thermosensitive neurons. *Journal of*  
764 *Neurophysiology* 69:739–752.
- 765 Clapham DE (2003) TRP channels as cellular sensors. *Nature* 426:517–524.
- 766 Cole MW, Bassett DS, Power JD, Braver TS, Petersen SE (2014) Intrinsic and Task-Evoked  
767 Network Architectures of the Human Brain. *Neuron* 83:238–251.
- 768 Craig AD, Bushnell MC, Zhang E-T, Blomqvist A (1994) A thalamic nucleus specific for pain  
769 and temperature sensation. *Nature* 372:770–773.
- 770 Craig AD, Chen K, Bandy D, Reiman EM (2000) Thermosensory activation of insular cortex.  
771 *Nat Neurosci* 3:184–190.
- 772 Craig AD, Reiman EM, Evans A, Bushnell MC (1996) Functional imaging of an illusion of pain.  
773 *Nature* 384:258–260.
- 774 Davis KD, Lozano AM, Manduch M, Tasker RR, Kiss ZHT, Dostrovsky JO (1999) Thalamic  
775 Relay Site for Cold Perception in Humans. *Journal of Neurophysiology* 81:1970–1973.
- 776 Deffieux T, Demené C, Tanter M (2021) Functional Ultrasound Imaging: A New Imaging  
777 Modality for Neuroscience. *Neuroscience* 474:110–121.
- 778 Demene C, Baranger J, Bernal M, Delanoe C, Auvin S, Biran V, Alison A, Mairesse J, Harribaud  
779 E, Pernot M, Tanter M, Baud O (2017) Functional ultrasound imaging of brain activity  
780 in human newborns. *Science Translational Medicine* 9.
- 781 Demene C, Deffieux T, Pernot M, Osmanski B-F, Biran V, Gennisson J-L, Sieu L-A, Bergel A,  
782 Franqui S, Correas J-M, Cohen I, Baud O, Tanter M (2015) Spatiotemporal Clutter  
783 Filtering of Ultrafast Ultrasound Data Highly Increases Doppler and fUltrasound  
784 Sensitivity. *IEEE Trans Med Imaging* 34:2271–2285.
- 785 Demertzi A, Tagliazucchi E, Dehaene S, Deco G, Barttfeld P, Raimondo F, Martial C, Fernández-  
786 Espejo D, Rohaut B, Voss HU, Schiff ND, Owen AM, Laureys S, Naccache L, Sitt JD (2019)  
787 Human consciousness is supported by dynamic complex patterns of brain signal  
788 coordination. *Sci Adv* 5:eaat7603.
- 789 Derbyshire SWG, Jones AKP, Creed F, Starz T, Meltzer CC, Townsend DW, Peterson AM,  
790 Firestone L (2002) Cerebral Responses to Noxious Thermal Stimulation in Chronic  
791 Low Back Pain Patients and Normal Controls. *NeuroImage* 16:158–168.

- 792 Dhaka A, Murray AN, Mathur J, Earley TJ, Petrus MJ, Patapoutian A (2007) TRPM8 Is Required  
793 for Cold Sensation in Mice. *Neuron* 54:371–378.
- 794 Di X, Biswal BB (2019) Toward Task Connectomics: Examining Whole-Brain Task Modulated  
795 Connectivity in Different Task Domains. *Cerebral Cortex* 29:1572–1583.
- 796 DiMicco JA, Zaretsky DV (2007) The dorsomedial hypothalamus: a new player in  
797 thermoregulation. *American Journal of Physiology-Regulatory, Integrative and*  
798 *Comparative Physiology* 292:R47–R63.
- 799 Dizeux A, Gesnik M, Ahnine H, Blaize K, Arcizet F, Picaud S, Sahel J-A, Deffieux T, Pouget P,  
800 Tanter M (2019) Functional ultrasound imaging of the brain reveals propagation of  
801 task-related brain activity in behaving primates. *Nat Commun* 10:1400.
- 802 Duncan GH, Bushnell MC, Oliveras JL, Bastrash N, Tremblay N (1993) Thalamic VPM nucleus  
803 in the behaving monkey. III. Effects of reversible inactivation by lidocaine on thermal  
804 and mechanical discrimination. *Journal of Neurophysiology* 70:2086–2096.
- 805 Ferrier J, Tiran E, Deffieux T, Tanter M, Lenkei Z (2020) Functional imaging evidence for task-  
806 induced deactivation and disconnection of a major default mode network hub in the  
807 mouse brain. *Proc Natl Acad Sci USA* 117:15270–15280.
- 808 Filingeri D ed. (2016) *Neurophysiology of Skin Thermal Sensations*. In: *Comprehensive*  
809 *Physiology*, 1st ed. Wiley. Available at:  
810 <https://onlinelibrary.wiley.com/doi/book/10.1002/cphy> [Accessed December 27,  
811 2021].
- 812 Gogolla N, Takesian AE, Feng G, Fagiolini M, Hensch TK (2014) Sensory Integration in Mouse  
813 Insular Cortex Reflects GABA Circuit Maturation. *Neuron* 83:894–905.
- 814 Gracheva EO, Bagriantsev SN (2015) Evolutionary adaptation to thermosensation. *Current*  
815 *Opinion in Neurobiology* 34:67–73.
- 816 Gu Y, Lin Y, Huang L, Ma J, Zhang J, Xiao Y, Dai Z, Alzheimer’s Disease Neuroimaging Initiative  
817 (2020) Abnormal dynamic functional connectivity in Alzheimer’s disease. *CNS*  
818 *Neurosci Ther* 26:962–971.
- 819 Hoffstaetter LJ, Bagriantsev SN, Gracheva EO (2018) TRPs et al.: a molecular toolkit for  
820 thermosensory adaptations. *Pflugers Arch - Eur J Physiol* 470:745–759.
- 821 Hutchison RM, Mirsattari SM, Jones CK, Gati JS, Leung LS (2010) Functional Networks in the  
822 Anesthetized Rat Brain Revealed by Independent Component Analysis of Resting-  
823 State fMRI. *Journal of Neurophysiology* 103:3398–3406.
- 824 Hutchison RM, Womelsdorf T, Allen EA, Bandettini PA, Calhoun VD, Corbetta M, Della Penna  
825 S, Duyn JH, Glover GH, Gonzalez-Castillo J, Handwerker DA, Keilholz S, Kiviniemi V,

- 826 Leopold DA, de Pasquale F, Sporns O, Walter M, Chang C (2013) Dynamic functional  
827 connectivity: Promise, issues, and interpretations. *NeuroImage* 80:360–378.
- 828 Iadecola C (2017) The Neurovascular Unit Coming of Age: A Journey through Neurovascular  
829 Coupling in Health and Disease. *Neuron* 96:17–42.
- 830 Imbault M, Chauvet D, Gennisson J-L, Capelle L, Tanter M (2017) Intraoperative Functional  
831 Ultrasound Imaging of Human Brain Activity. *Sci Rep* 7:7304.
- 832 Ishiwata T, Hasegawa H, Yazawa T, Otokawa M, Aihara Y (2002) Functional role of the  
833 preoptic area and anterior hypothalamus in thermoregulation in freely moving rats.  
834 *Neuroscience Letters* 325:167–170.
- 835 Liska A, Galbusera A, Schwarz AJ, Gozzi A (2015) Functional connectivity hubs of the mouse  
836 brain. *NeuroImage* 115:281–291.
- 837 Macé E, Montaldo G, Cohen I, Baulac M, Fink M, Tanter M (2011) Functional ultrasound  
838 imaging of the brain. *Nat Methods* 8:662–664.
- 839 Macé É, Montaldo G, Trenholm S, Cowan C, Brignall A, Urban A, Roska B (2018) Whole-Brain  
840 Functional Ultrasound Imaging Reveals Brain Modules for Visuomotor Integration.  
841 *Neuron* 100:1241-1251.e7.
- 842 Middleton SJ, Barry AM, Comini M, Li Y, Ray PR, Shiers S, Themistocleous AC, Uhelski ML,  
843 Yang X, Dougherty PM, Price TJ, Bennett DL (2021) Studying human nociceptors: from  
844 fundamentals to clinic. *Brain* 144:1312–1335.
- 845 Milenkovic N, Zhao W-J, Walcher J, Albert T, Siemens J, Lewin GR, Poulet JFA (2014) A  
846 somatosensory circuit for cooling perception in mice. *Nat Neurosci* 17:1560–1566.
- 847 Montaldo G, Urban A, Macé E (2022) Functional Ultrasound Neuroimaging. *Annual Review of*  
848 *Neuroscience* 45:491–513.
- 849 Moulton EA, Pendse G, Becerra LR, Borsook D (2012) BOLD Responses in Somatosensory  
850 Cortices Better Reflect Heat Sensation than Pain. *Journal of Neuroscience* 32:6024–  
851 6031.
- 852 Olausson H, Charron J, Marchand S, Villemure C, Strigo IA, Bushnell MC (2005) Feelings of  
853 warmth correlate with neural activity in right anterior insular cortex. *Neuroscience*  
854 *Letters* 389:1–5.
- 855 Osmanski BF, Martin C, Montaldo G, Lanièce P, Pain F, Tanter M, Gurden H (2014a) Functional  
856 ultrasound imaging reveals different odor-evoked patterns of vascular activity in the  
857 main olfactory bulb and the anterior piriform cortex. *NeuroImage* 95:176–184.
- 858 Osmanski B-F, Pezet S, Ricobaraza A, Lenkei Z, Tanter M (2014b) Functional ultrasound  
859 imaging of intrinsic connectivity in the living rat brain with high spatiotemporal  
860 resolution. *Nature communications* 5:5023.

- 861 Pais-Roldán P, Mateo C, Pan W-J, Acland B, Kleinfeld D, Snyder LH, Yu X, Keilholz S (2021)  
862 Contribution of animal models toward understanding resting state functional  
863 connectivity. *NeuroImage* 245:118630.
- 864 Patapoutian A, Peier AM, Story GM, Viswanath V (2003) ThermoTRP channels and beyond:  
865 mechanisms of temperature sensation. *Nat Rev Neurosci* 4:529–539.
- 866 Peier AM, Moqrich A, Hergarden AC, Reeve AJ, Andersson DA, Story GM, Earley TJ, Dragoni I,  
867 McIntyre P, Bevan S, Patapoutian A (2002) A TRP Channel that Senses Cold Stimuli  
868 and Menthol. *Cell* 108:705–715.
- 869 Peltz E, Seifert F, DeCol R, Dörfler A, Schwab S, Maihöfner C (2011) Functional connectivity  
870 of the human insular cortex during noxious and innocuous thermal stimulation.  
871 *NeuroImage* 54:1324–1335.
- 872 Preti MG, Bolton TA, Van De Ville D (2017) The dynamic functional connectome: State-of-the-  
873 art and perspectives. *NeuroImage* 160:41–54.
- 874 Rabut C, Ferrier J, Bertolo A, Osmanski B, Mousset X, Pezet S, Deffieux T, Lenkei Z, Tanter M  
875 (2020) Pharmaco-fUS: Quantification of pharmacologically-induced dynamic changes  
876 in brain perfusion and connectivity by functional ultrasound imaging in awake mice.  
877 *NeuroImage* 222:117231.
- 878 Rahal L, Thibaut M, Rivals I, Claron J, Lenkei Z, Sitt JD, Tanter M, Pezet S (2020) Ultrafast  
879 ultrasound imaging pattern analysis reveals distinctive dynamic brain states and  
880 potent sub-network alterations in arthritic animals. *Scientific Reports* 10:1–17.
- 881 Sieu L-A, Bergel A, Tiran E, Deffieux T, Pernot M, Gennisson J-L, Tanter M, Cohen I (2015) EEG  
882 and functional ultrasound imaging in mobile rats. *Nat Methods* 12:831–834.
- 883 Soloukey S, Vincent AJPE, Satoer DD, Mastik F, Smits M, Dirven CMF, Strydis C, Bosch JG, van  
884 der Steen AFW, De Zeeuw CI, Koekkoek SKE, Kruizinga P (2020) Functional  
885 Ultrasound (fUS) During Awake Brain Surgery: The Clinical Potential of Intra-  
886 Operative Functional and Vascular Brain Mapping. *Front Neurosci* 13:1384.
- 887 Tan C-H, McNaughton PA (2016) The TRPM2 ion channel is required for sensitivity to  
888 warmth. *Nature* 536:460–463.
- 889 Tan CL, Knight ZA (2018) Regulation of Body Temperature by the Nervous System. *Neuron*  
890 98:31–48.
- 891 Tarun A, Wainstein-Andriano D, Sterpenich V, Bayer L, Perogamvros L, Solms M, Axmacher  
892 N, Schwartz S, Van De Ville D (2021) NREM sleep stages specifically alter dynamical  
893 integration of large-scale brain networks. *iScience* 24:101923.
- 894 Tian L, Li Q, Wang C, Yu J (2018) Changes in dynamic functional connections with aging.  
895 *NeuroImage* 172:31–39.



- 896 Tiran E, Ferrier J, Deffieux T, Gennisson JL, Pezet S, Lenkei Z, Tanter M (2017) Transcranial  
897 Functional Ultrasound Imaging in Freely Moving Awake Mice and Anesthetized Young  
898 Rats without Contrast Agent. *Ultrasound in Medicine and Biology* 43:1679–1689.
- 899 Urban A, Dussaux C, Martel G, Brunner C, Mace E, Montaldo G (2015) Real-time imaging of  
900 brain activity in freely moving rats using functional ultrasound. *Nat Methods* 12:873–  
901 878.
- 902 Vandewauw I, De Clercq K, Mulier M, Held K, Pinto S, Van Ranst N, Segal A, Voet T, Vennekens  
903 R, Zimmermann K, Vriens J, Voets T (2018) A TRP channel trio mediates acute noxious  
904 heat sensing. *Nature* 555:662–666.
- 905 Veldhuijzen DS, Greenspan JD, Kim JH, Lenz FA (2010) Altered pain and thermal sensation in  
906 subjects with isolated parietal and insular cortical lesions. *European Journal of Pain*  
907 14:535.e1-535.e11.
- 908 Vilar B, Tan C-H, McNaughton PA (2020) Heat detection by the TRPM2 ion channel. *Nature*  
909 584:E5–E12.
- 910 Vogt BA (2005) Pain and emotion interactions in subregions of the cingulate gyrus. *Nat Rev*  
911 *Neurosci* 6:533–544.
- 912 Vriens J, Nilius B, Voets T (2014) Peripheral thermosensation in mammals. *Nat Rev Neurosci*  
913 15:573–589.
- 914 Wager TD, Atlas LY, Lindquist MA, Roy M, Woo C-W, Kross E (2013) An fMRI-Based  
915 Neurologic Signature of Physical Pain. *New England Journal of Medicine* 368:1388–  
916 1397.
- 917 Wang TA, Teo CF, Åkerblom M, Chen C, Tynan-La Fontaine M, Greiner VJ, Diaz A, McManus  
918 MT, Jan YN, Jan LY (2019) Thermoregulation via Temperature-Dependent PGD2  
919 Production in Mouse Preoptic Area. *Neuron* 103:309-322.e7.
- 920 Xiao R, Xu XZS (2021) Temperature Sensation: From Molecular Thermosensors to Neural  
921 Circuits and Coding Principles. *Annu Rev Physiol* 83:205–230.
- 922 Yahiro T, Kataoka N, Nakamura Y, Nakamura K (2017) The lateral parabrachial nucleus, but  
923 not the thalamus, mediates thermosensory pathways for behavioural  
924 thermoregulation. *Sci Rep* 7:5031.
- 925 Zeng L-L, Shen H, Liu L, Wang L, Li B, Fang P, Zhou Z, Li Y, Hu D (2012) Identifying major  
926 depression using whole-brain functional connectivity: a multivariate pattern analysis.  
927 *Brain* 135:1498–1507.
- 928 Zerbi V, Grandjean J, Rudin M, Wenderoth N (2015) Mapping the mouse brain with rs-fMRI:  
929 An optimized pipeline for functional network identification. *NeuroImage* 123:11–21.
- 930
